# Supplementary material
Source: PubMed Central journal article supplement (PMC1657045)
Supplement: pgen.0020185.st001.pdf [file pgen.0020185.st001.pdf]

**Table S1. Detailed examples of *M. leprae* pseudogenes with ortholog genes in *M. tuberculosis***

| Pseudogenes* | Promoter-like Signals |                 | GC Content            |                 | Average Score         |                 |
|--------------|-----------------------|-----------------|-----------------------|-----------------|-----------------------|-----------------|
|              | <i>M_tuberculosis</i> | <i>M_leprae</i> | <i>M_tuberculosis</i> | <i>M_leprae</i> | <i>M_tuberculosis</i> | <i>M_leprae</i> |
| <i>BfrB</i>  | 13                    | 62              | 0.51                  | 0.31            | 6.08                  | 5.77            |
| <i>cmaA1</i> | 1                     | 26              | 0.65                  | 0.48            | 4.41                  | 4.77            |
| <i>Icl</i>   | 12                    | 11              | 0.53                  | 0.49            | 4.24                  | 4.11            |
| <i>lldD1</i> | 2                     | 11              | 0.72                  | 0.52            | 3.24                  | 5.13            |
| <i>UmaA</i>  | 6                     | 13              | 0.56                  | 0.55            | 4.91                  | 3.94            |
| <i>gnd2</i>  | 1                     | 6               | 0.65                  | 0.56            | 6.04                  | 4.68            |
| <i>glnA3</i> | 2                     | 13              | 0.62                  | 0.58            | 3.75                  | 3.52            |
| <i>MetC</i>  | 1                     | 4               | 0.68                  | 0.58            | 6.15                  | 4.1             |
| <i>PdhB</i>  | 1                     | 1               | 0.63                  | 0.58            | 3.71                  | 4.28            |
| <i>CitA</i>  | 1                     | 6               | 0.62                  | 0.59            | 2.86                  | 4.22            |
| <i>LigB</i>  | 2                     | 4               | 0.62                  | 0.6             | 4.07                  | 3.6             |
| <i>icd1</i>  | 4                     | 6               | 0.67                  | 0.6             | 4.29                  | 4.63            |
| <i>glnA4</i> | 8                     | 12              | 0.62                  | 0.6             | 3.54                  | 3.38            |
| <i>PdhA</i>  | 4                     | 3               | 0.63                  | 0.61            | 4.18                  | 2.87            |
| <i>PdhC</i>  | 2                     | 4               | 0.63                  | 0.62            | 3.78                  | 3.69            |
| <i>LpdA</i>  | 3                     | 7               | 0.68                  | 0.63            | 3.66                  | 3.05            |

\* *M. leprae* pseudogenes whose orthologues in *M. tuberculosis* are functional genes. Information about of the metabolic pathways where these genes are involved is described in [Cole ST et al. 2001. Nature 409:1007-1011]. Data are ordered by the GC content of the upstream regions of the *M. leprae* pseudogenes. Except for *icl*, *pdhA* and *pdhB*, there is a trend to get more promoter-like signals in the upstream regions of pseudogenes. This increase of signals is related with the increase of mutations from GC to AT bases. 69% of *M. leprae* pseudogenes have a average promoter score lower than their ortholog gene in *M. tuberculosis* suggesting an effect of the AT-enrichment in the degradation of the promoter signal.
