# Supplementary material
Source: PubMed Central journal article supplement (PMC1657045)

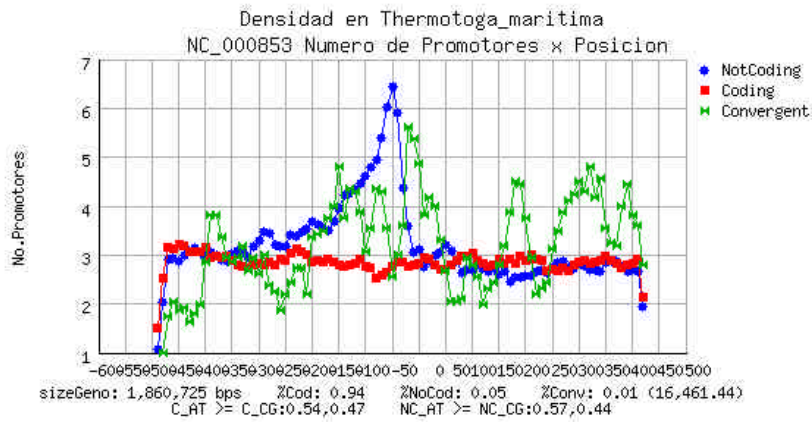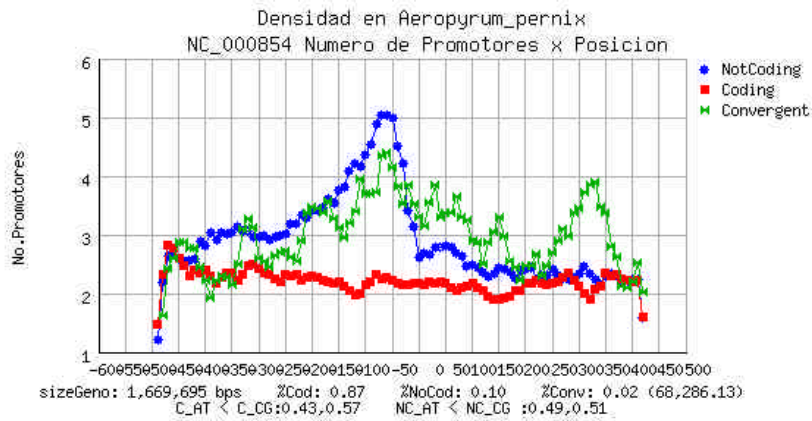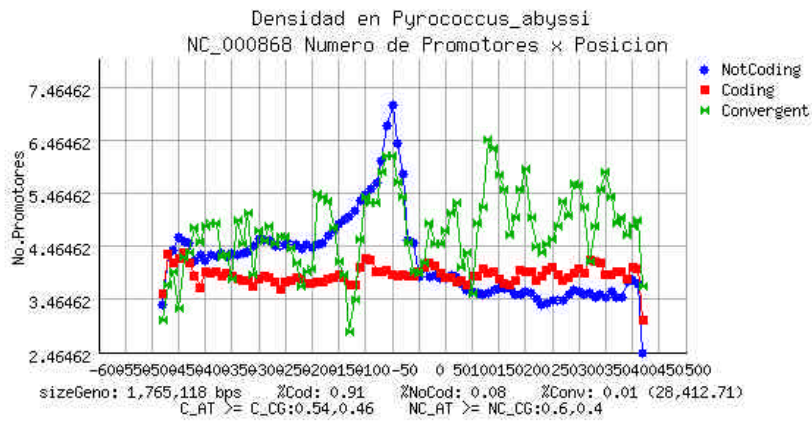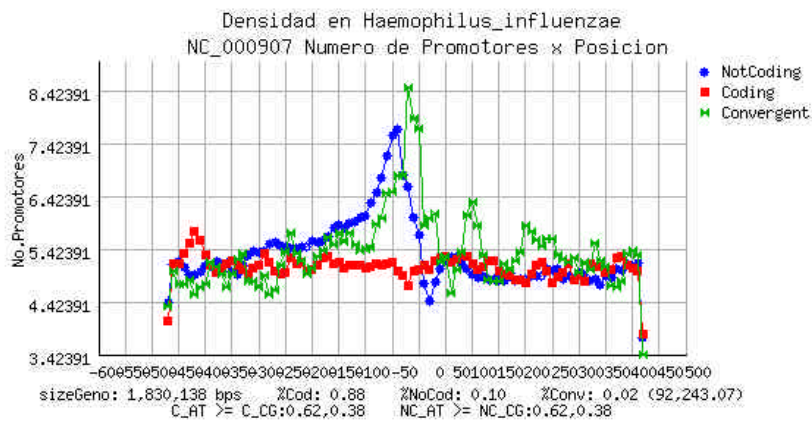

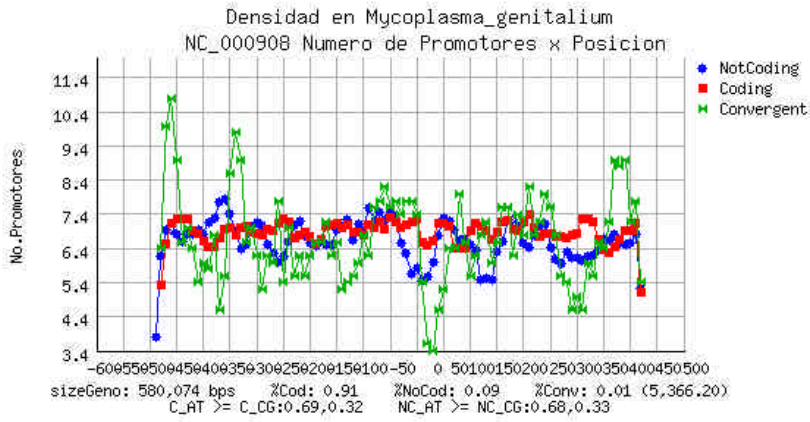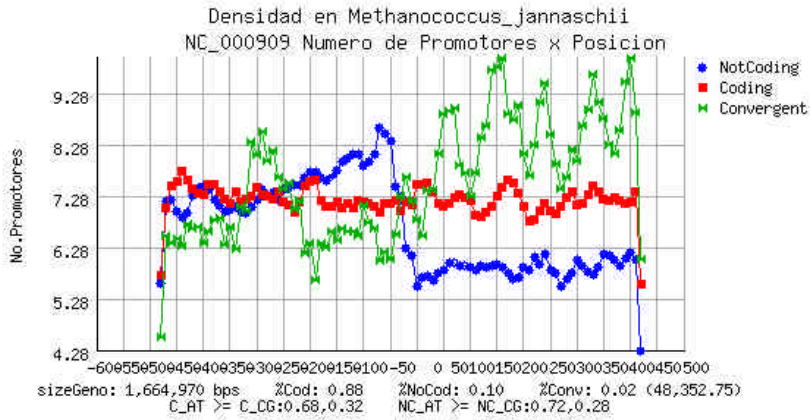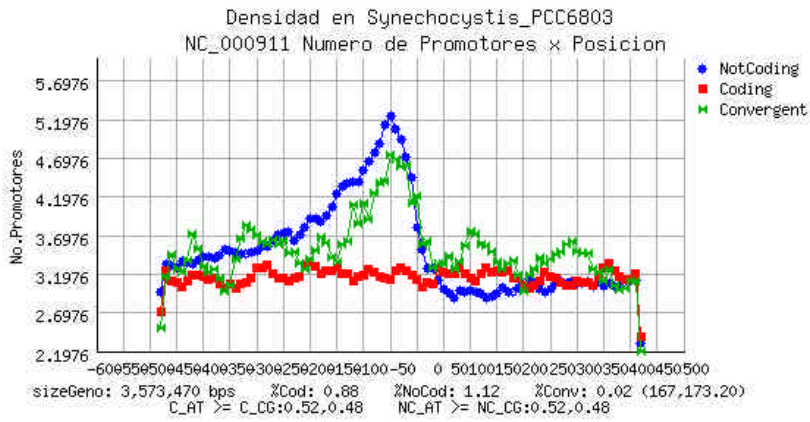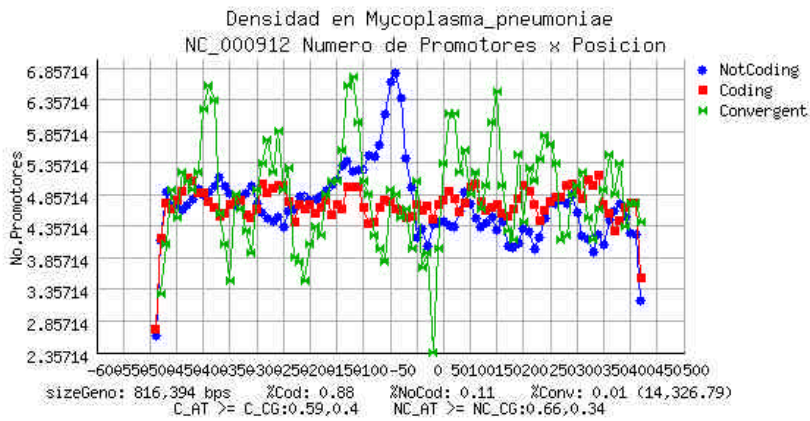

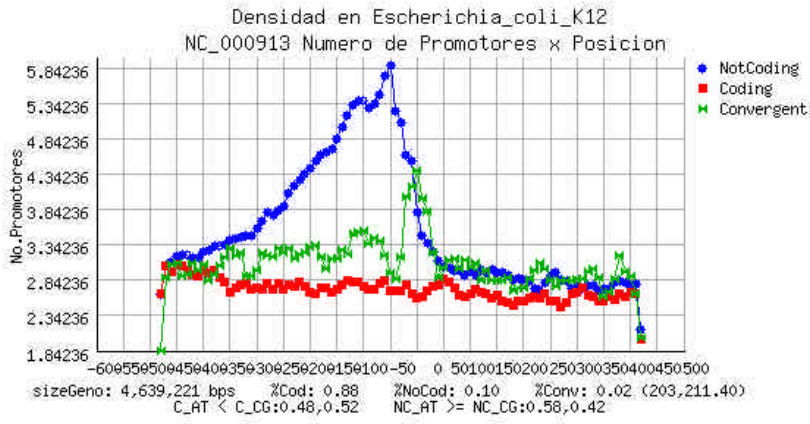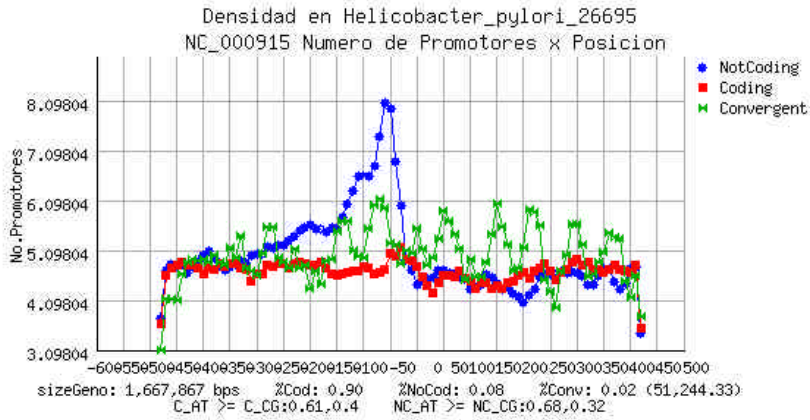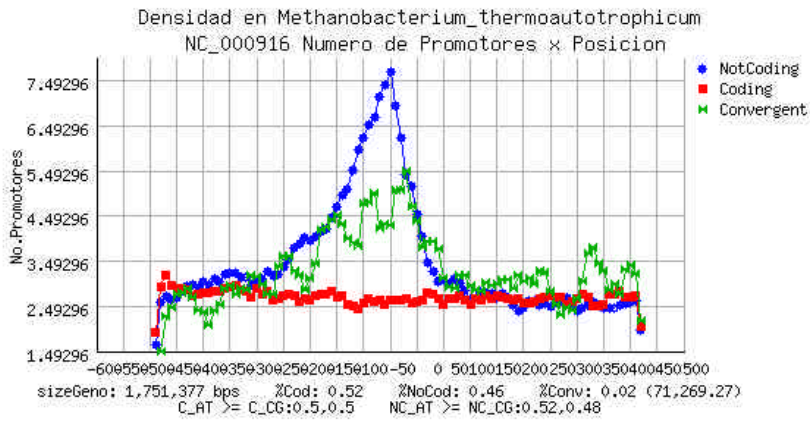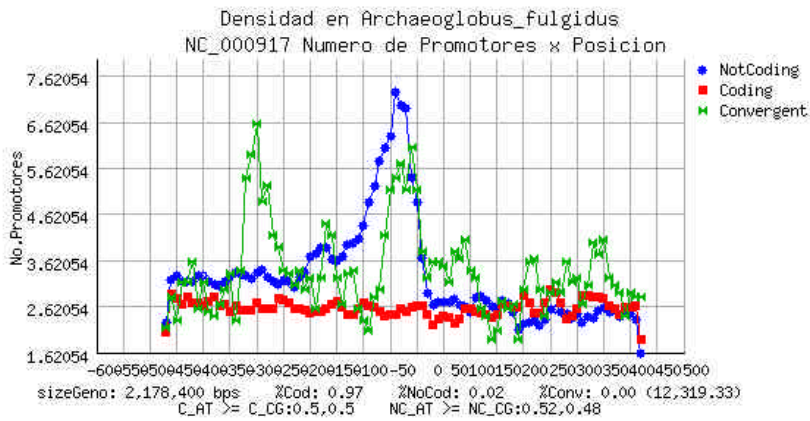

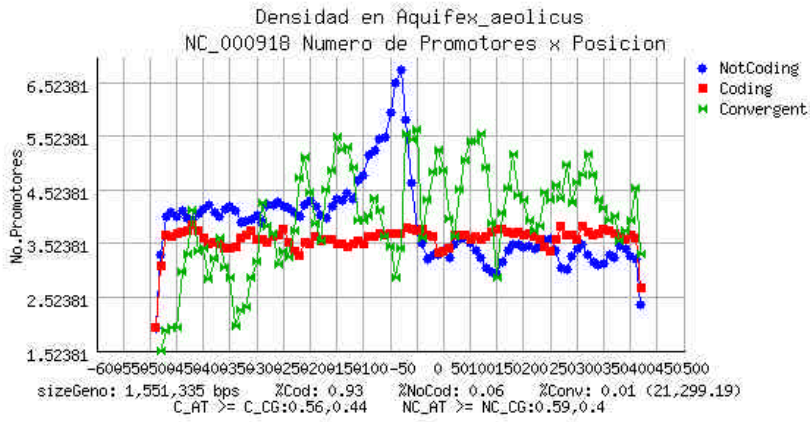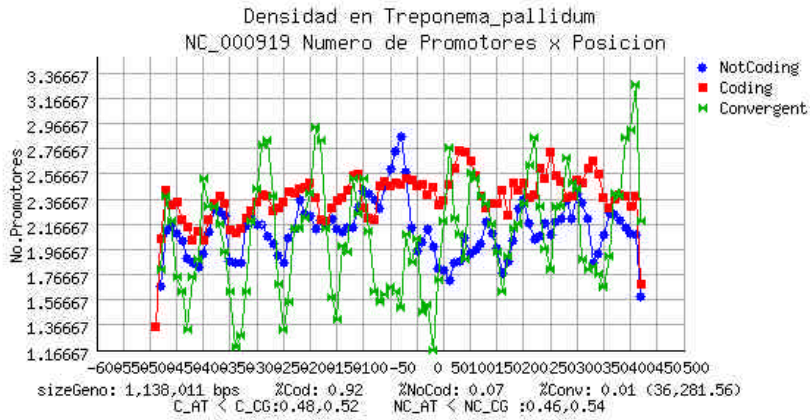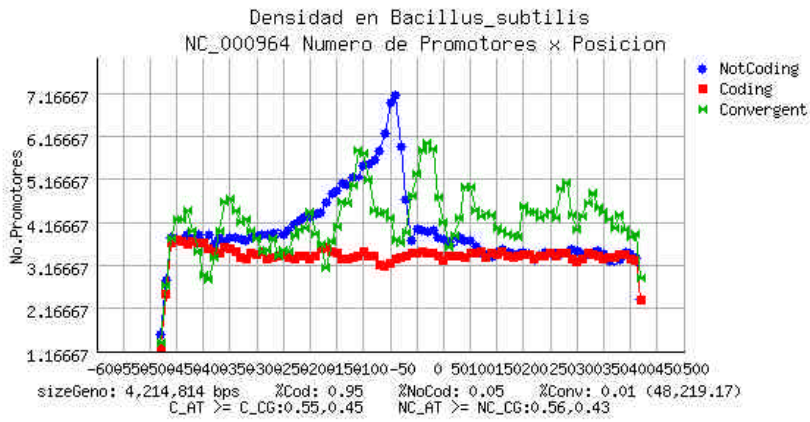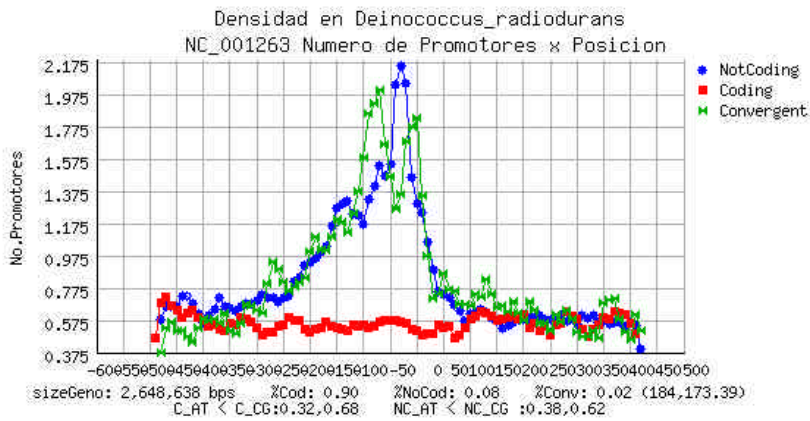

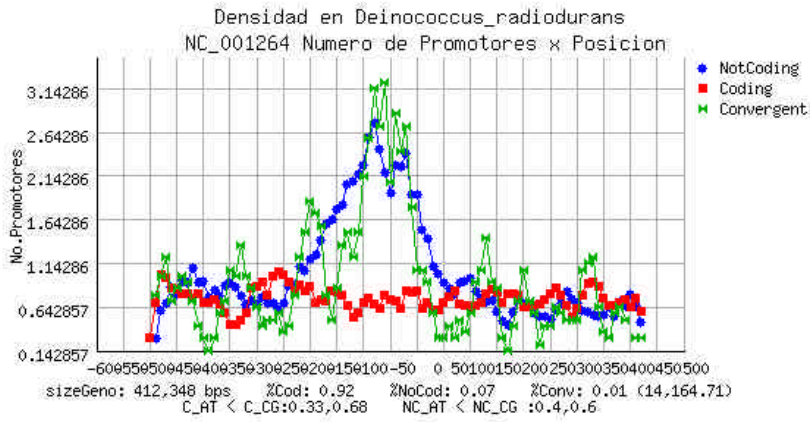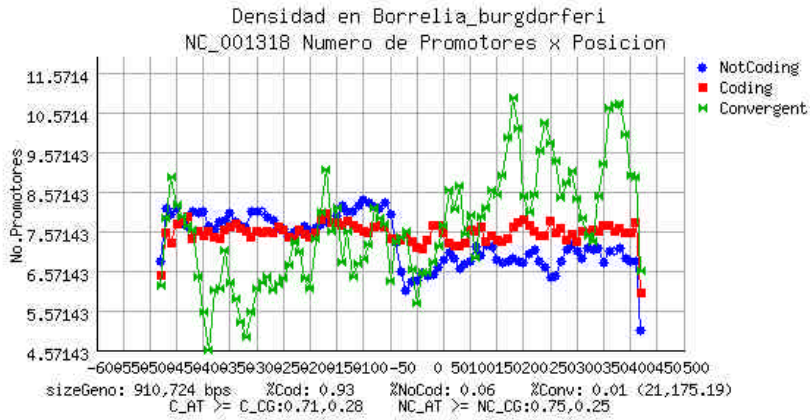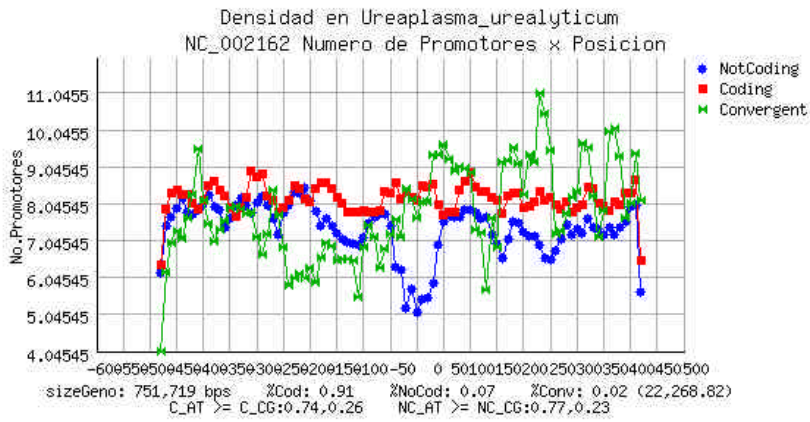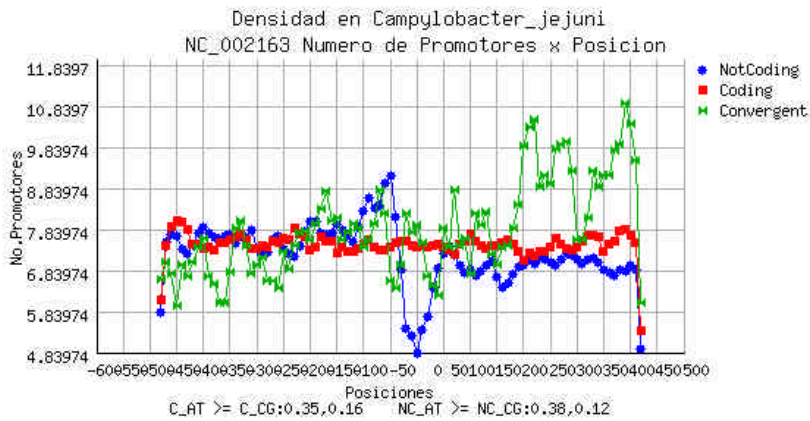

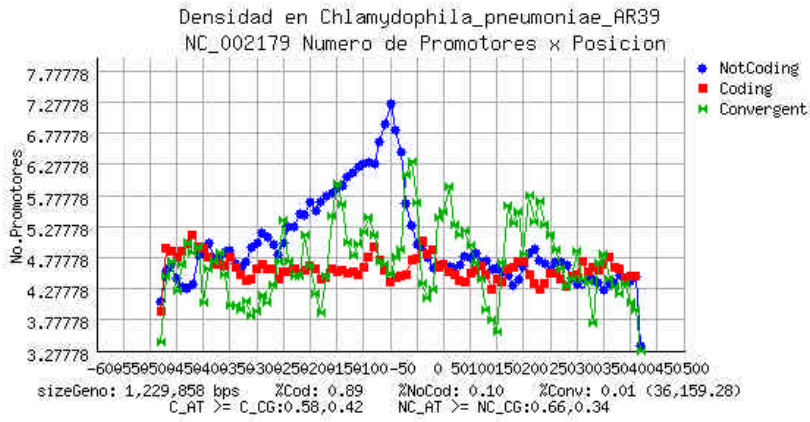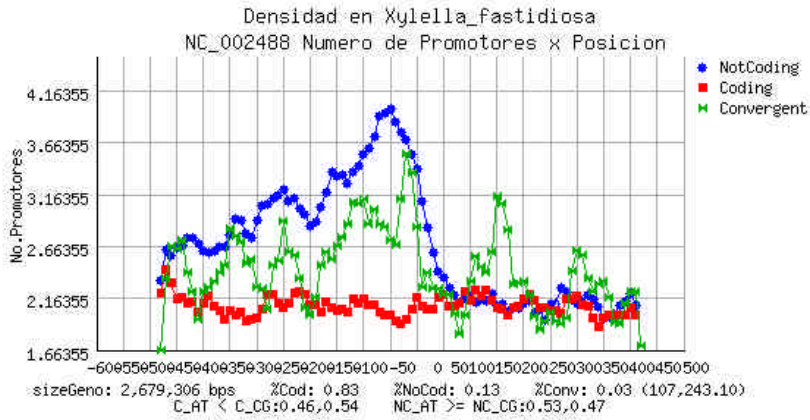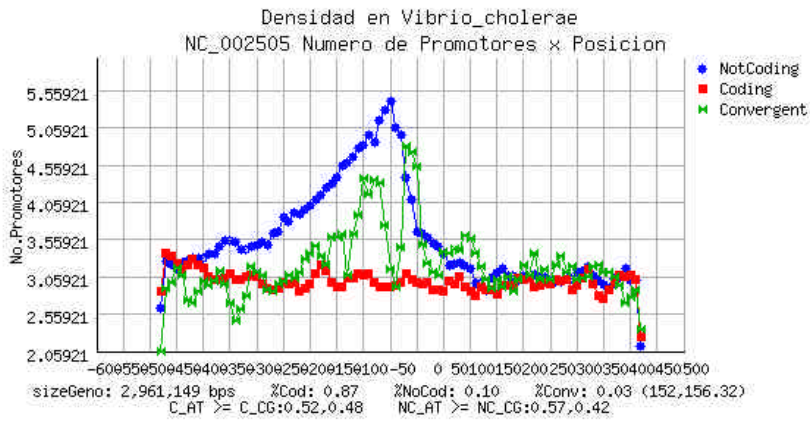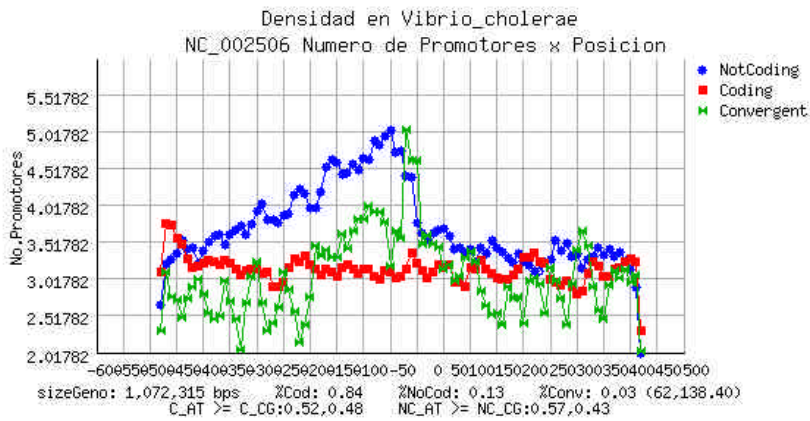

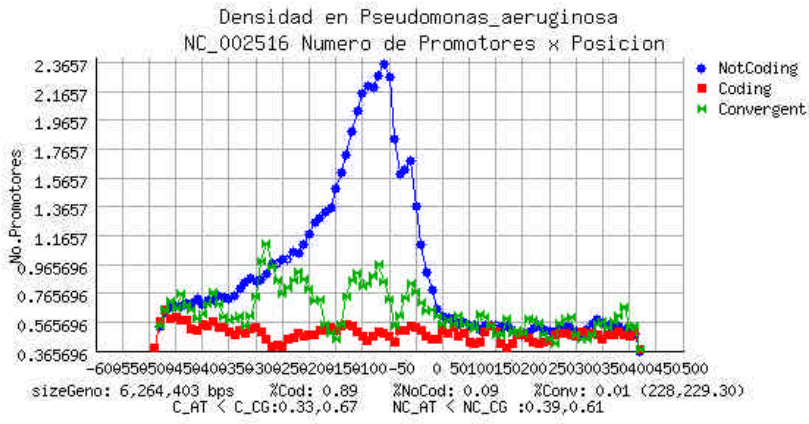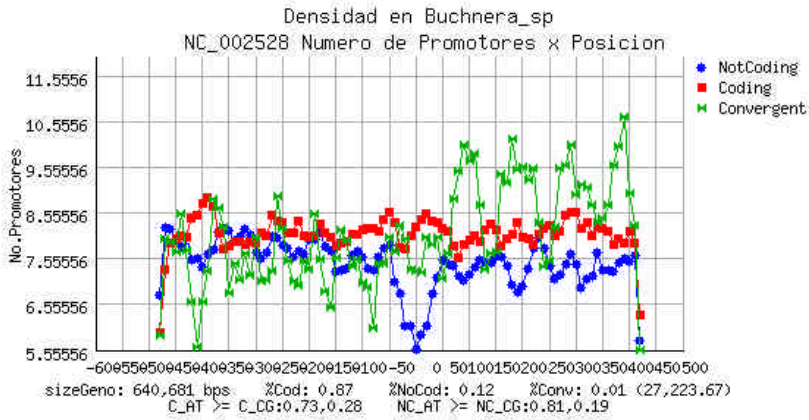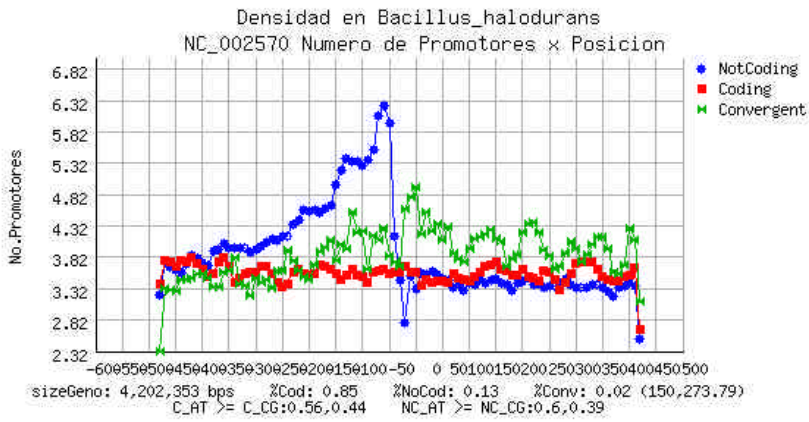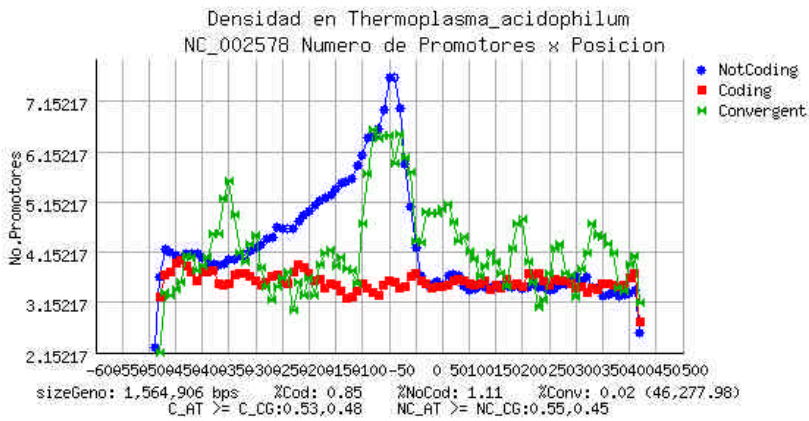

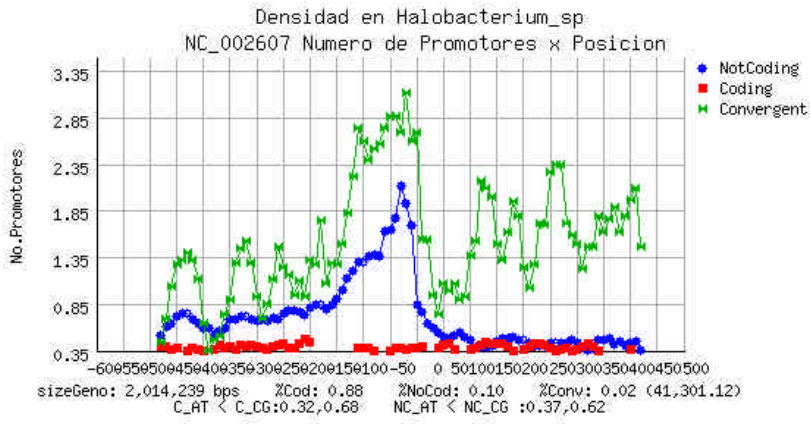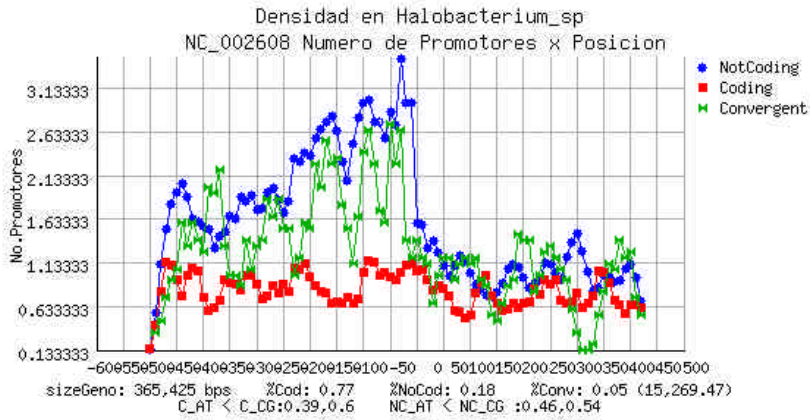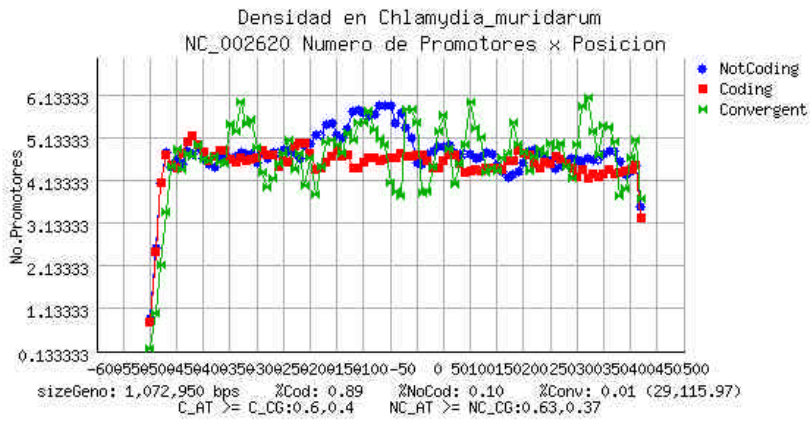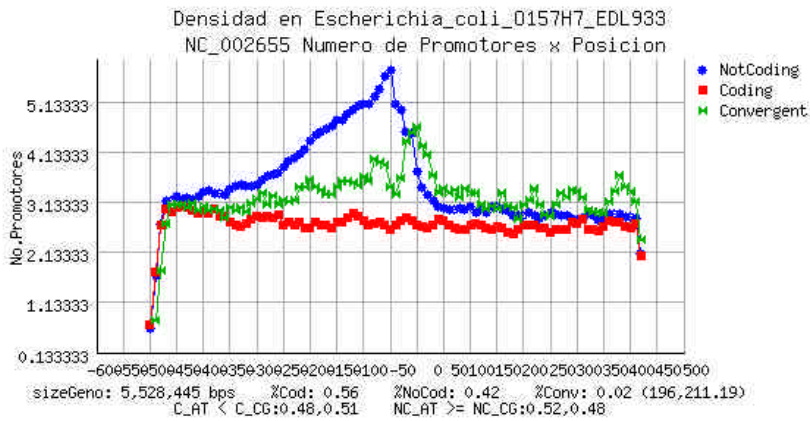



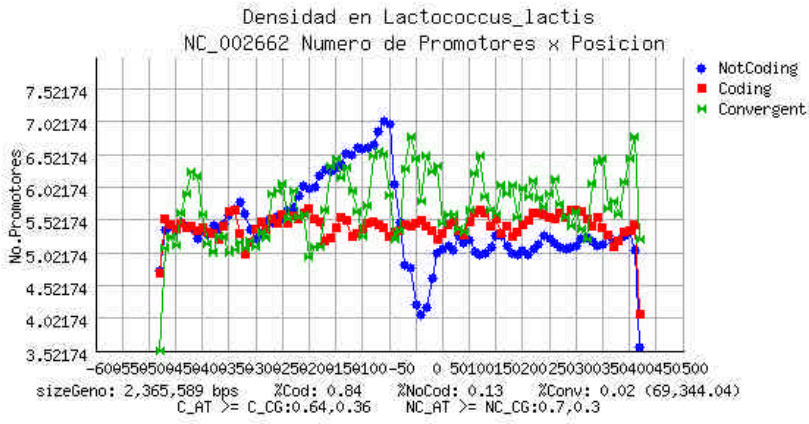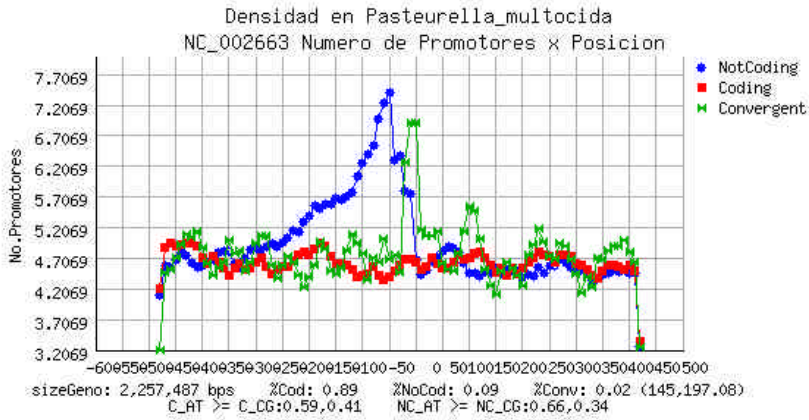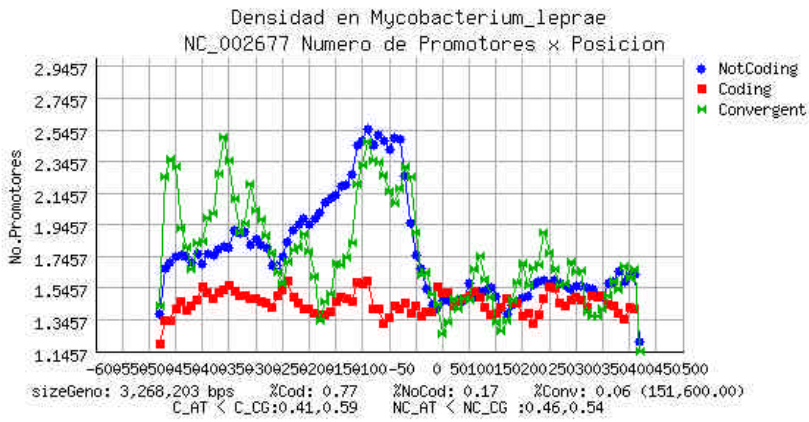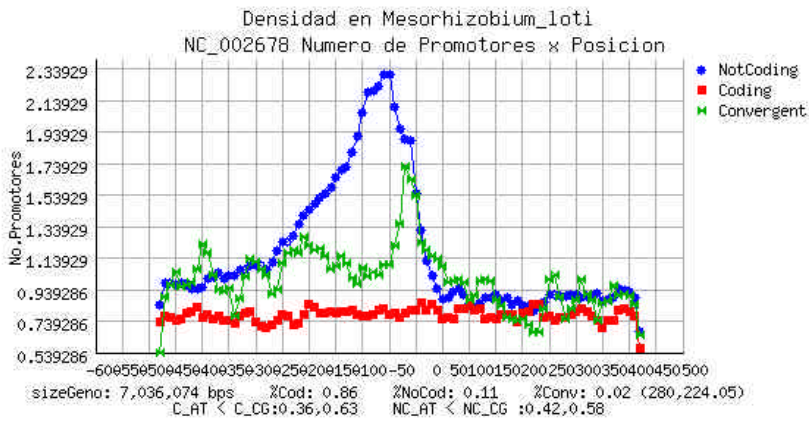

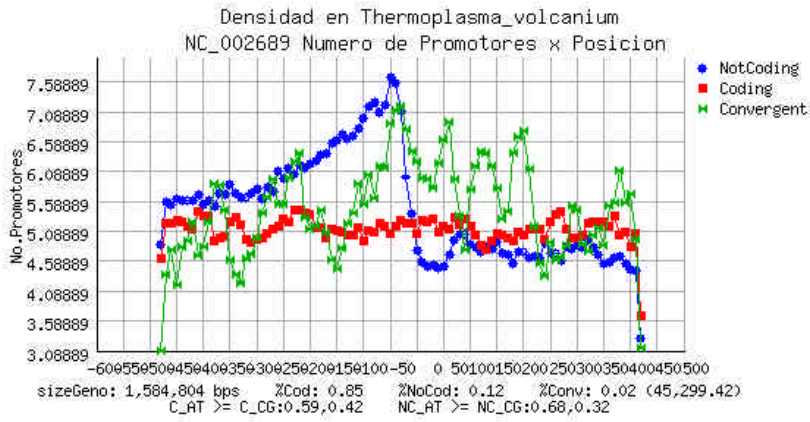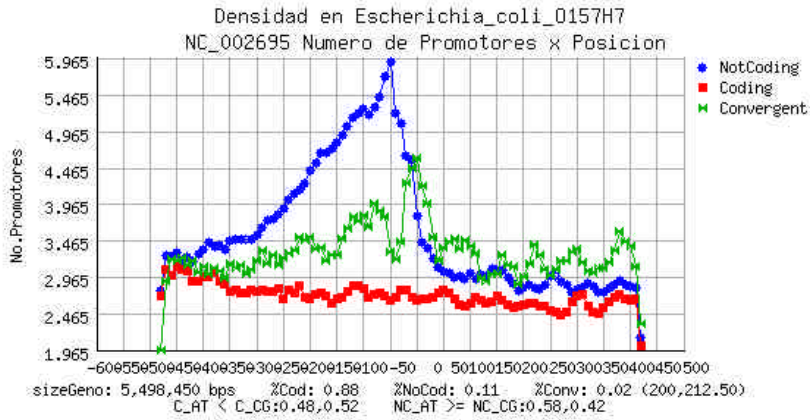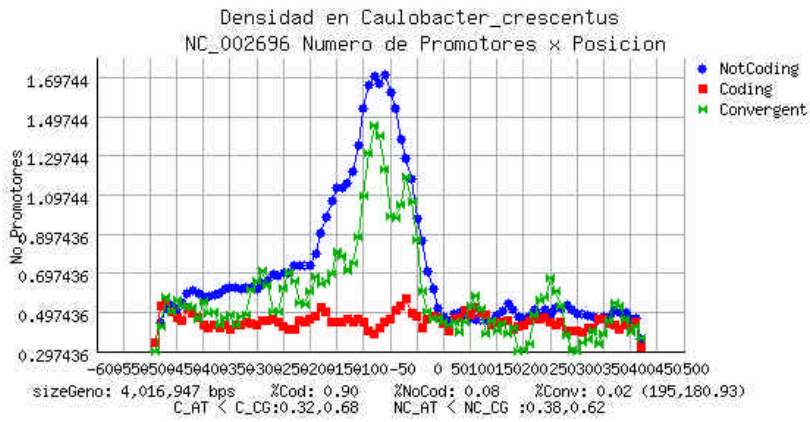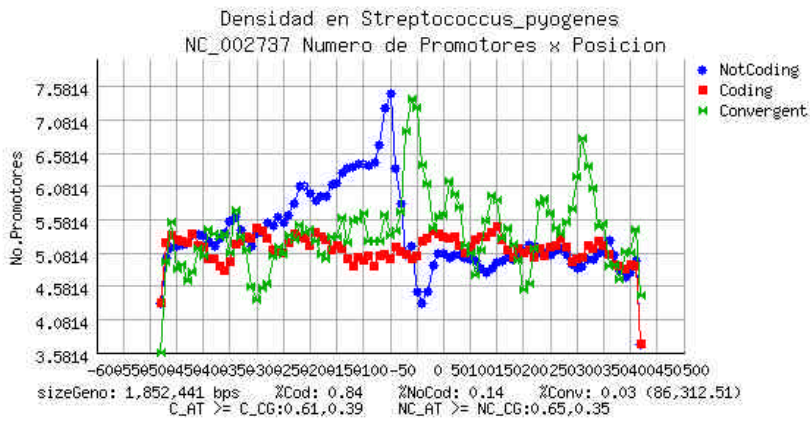

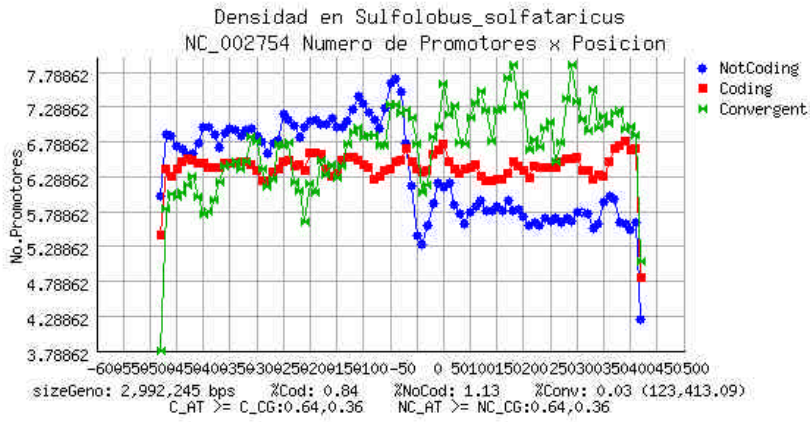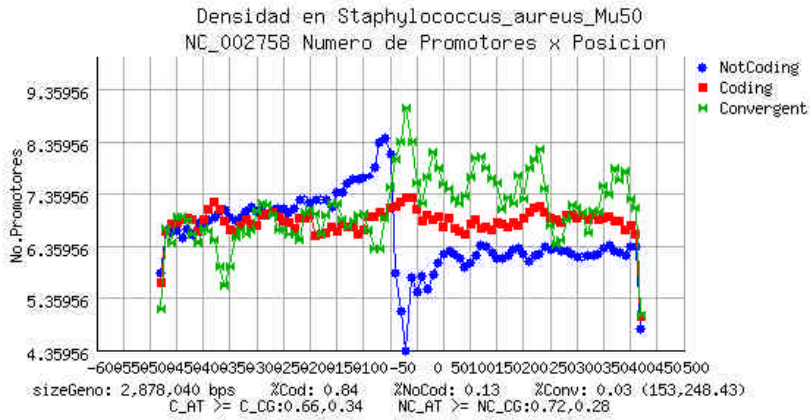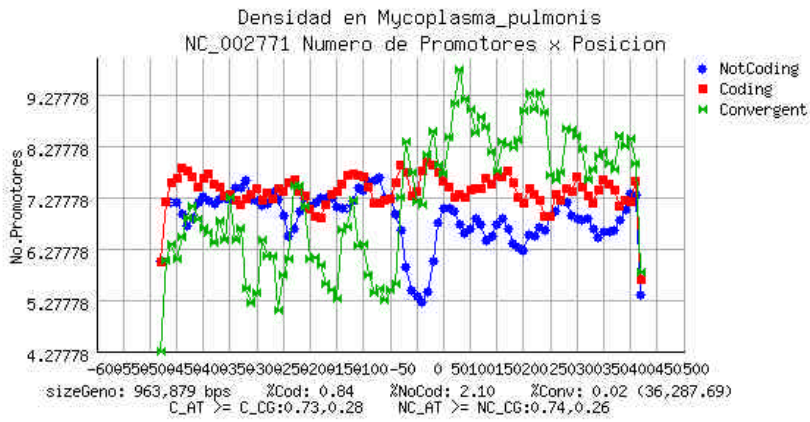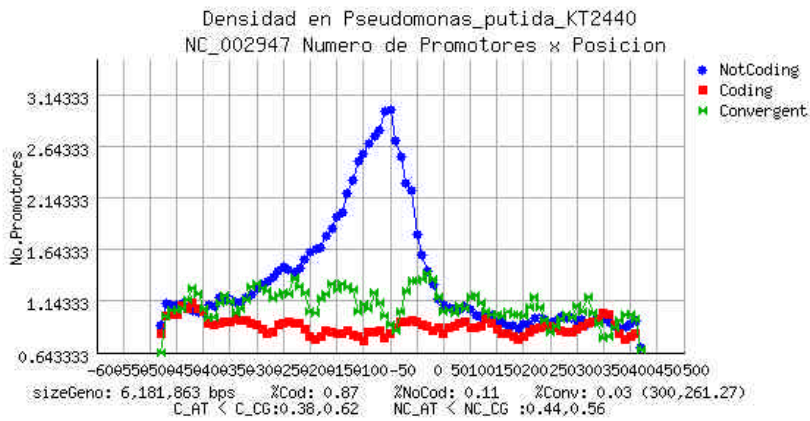

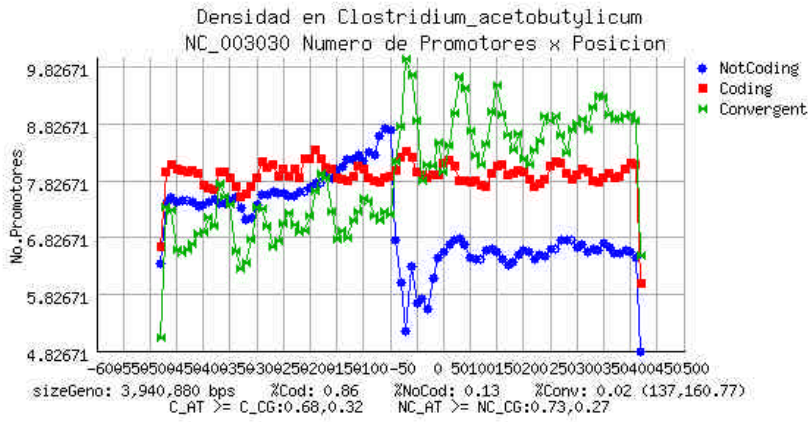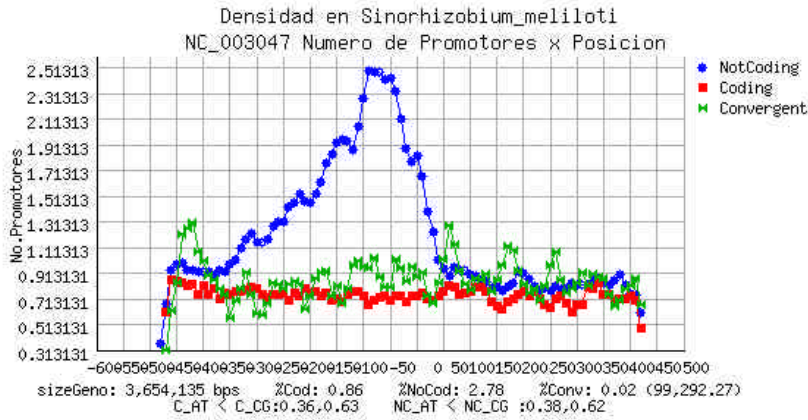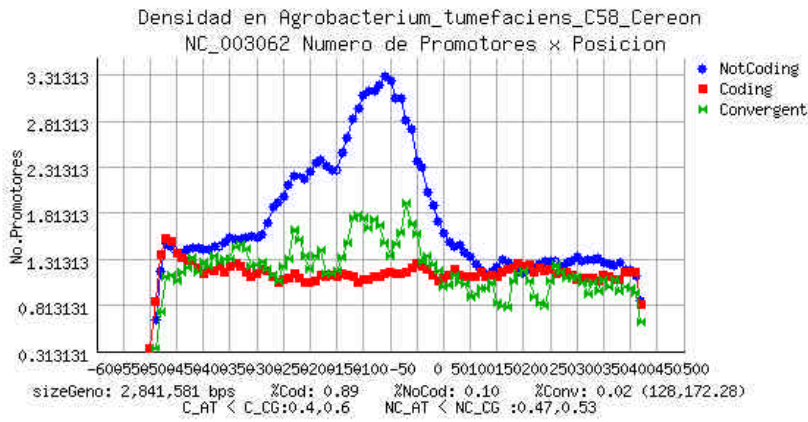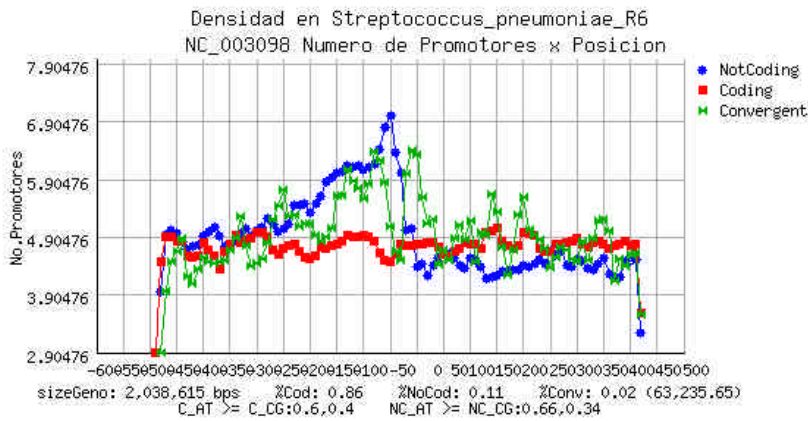

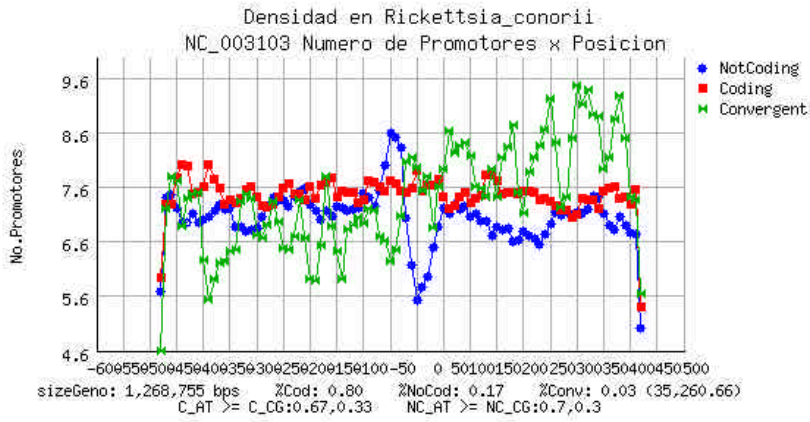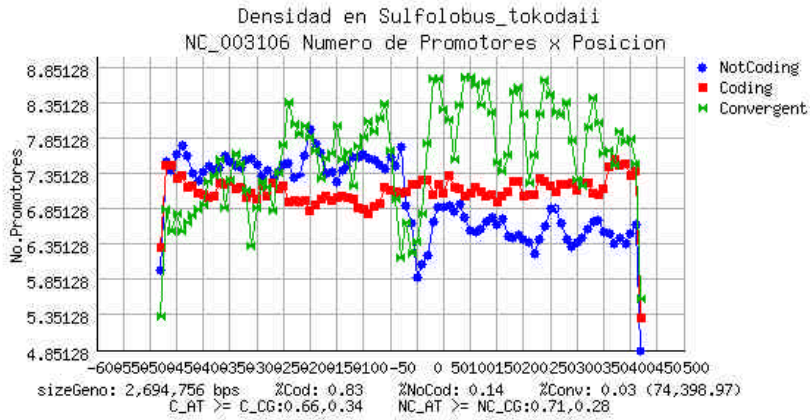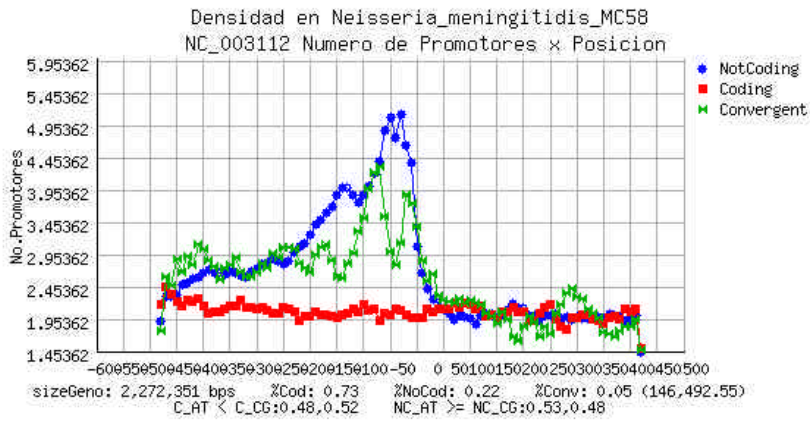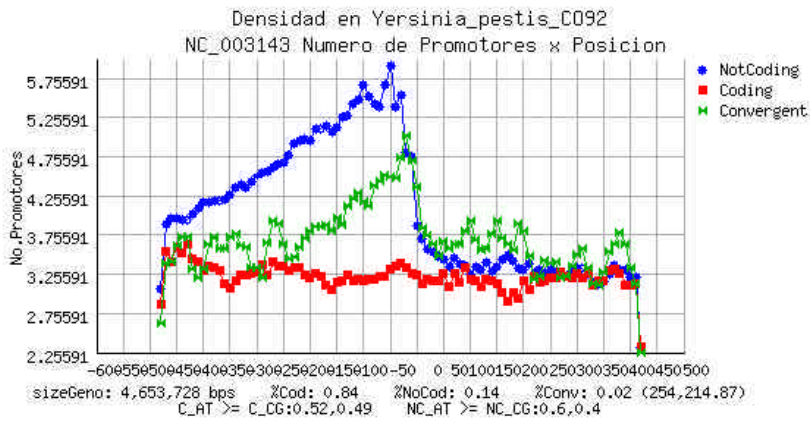

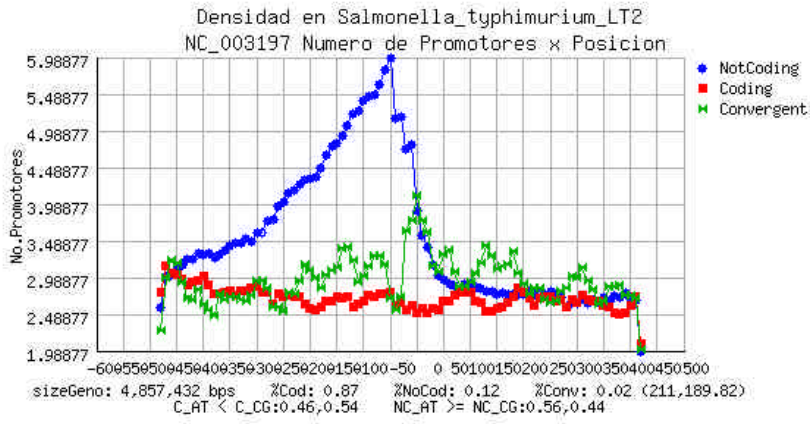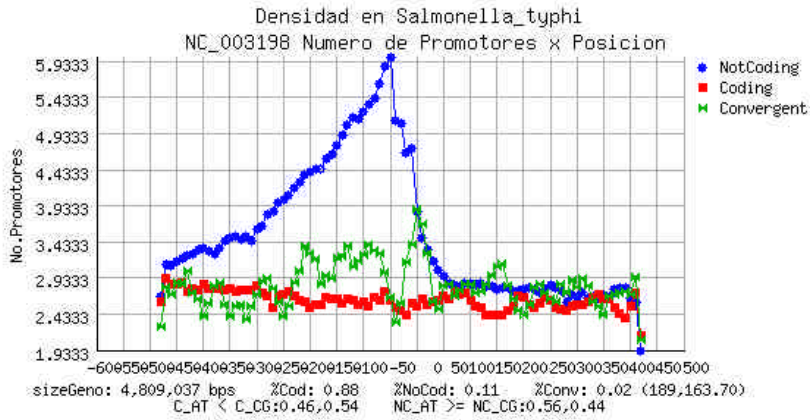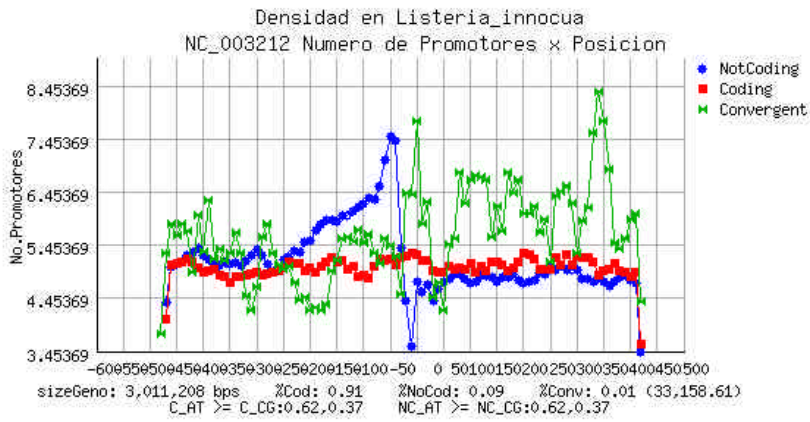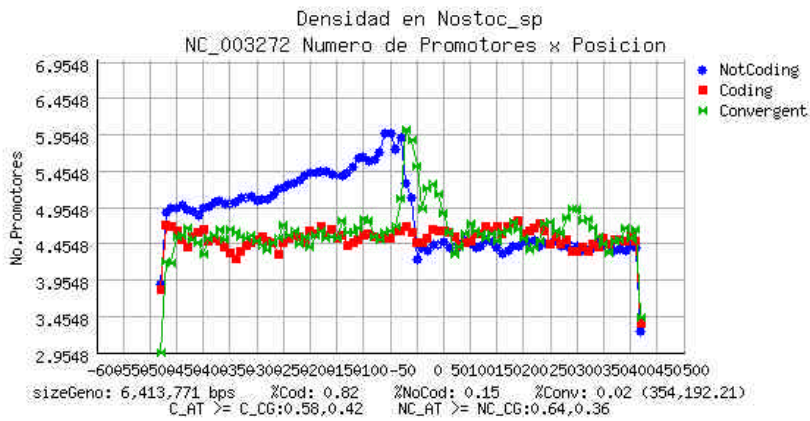

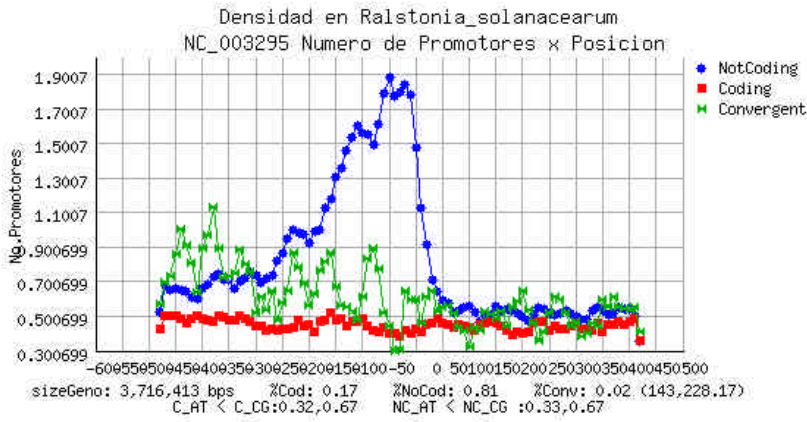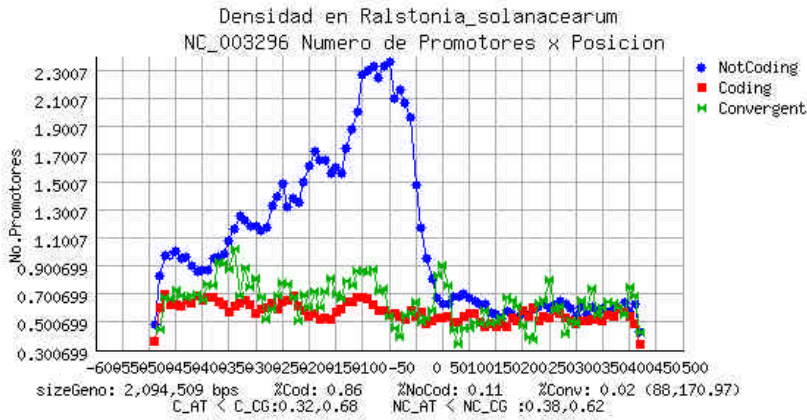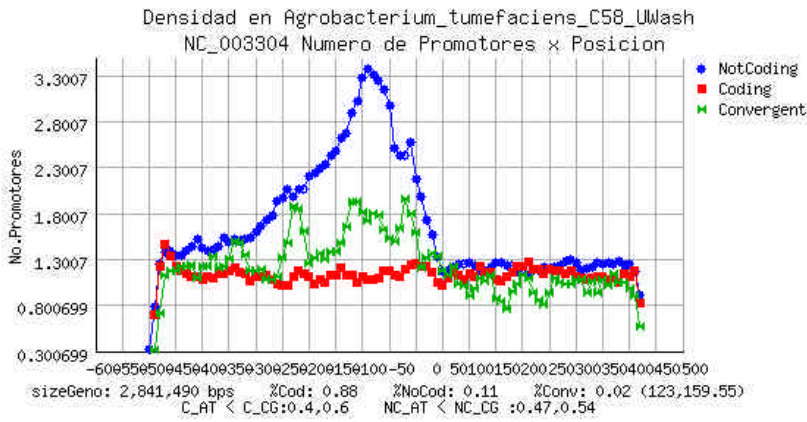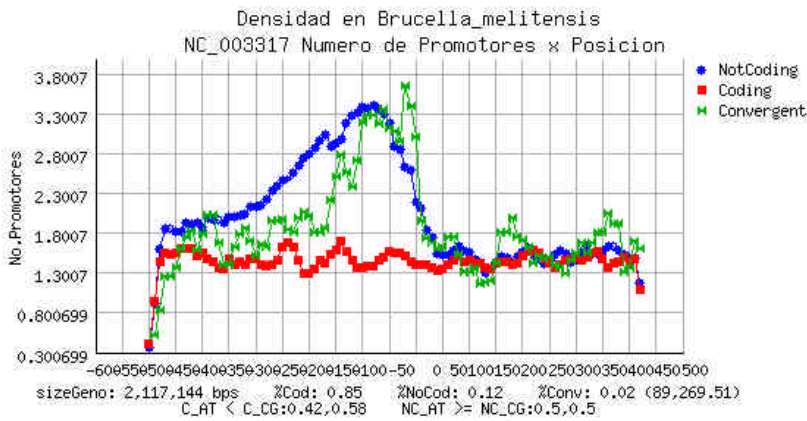

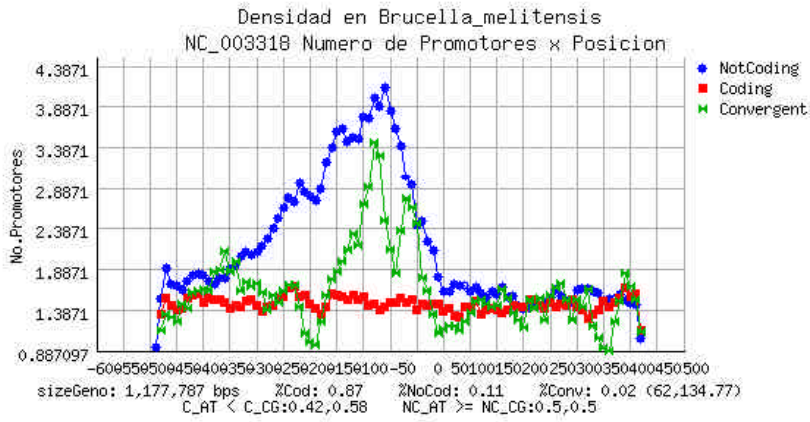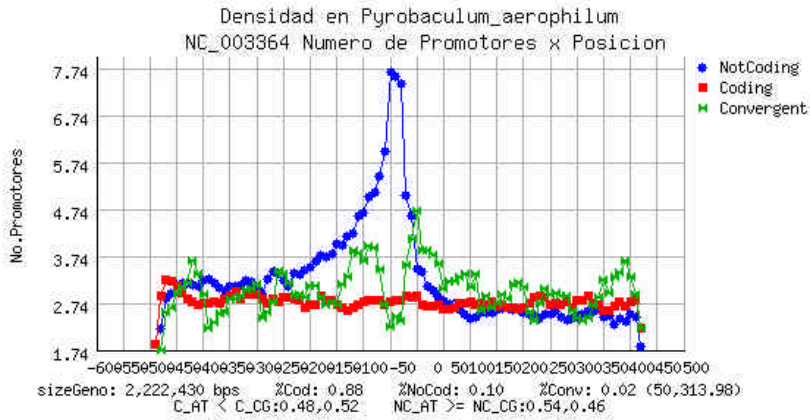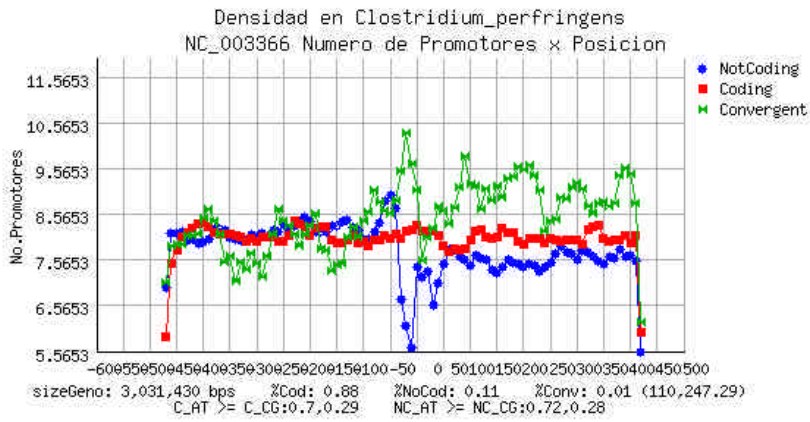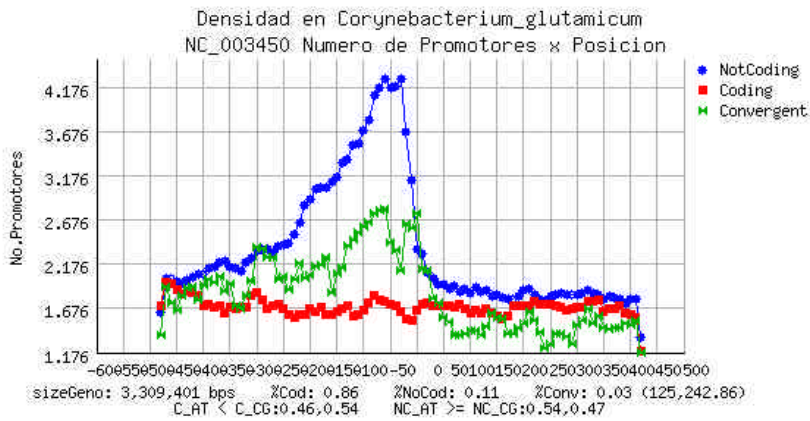



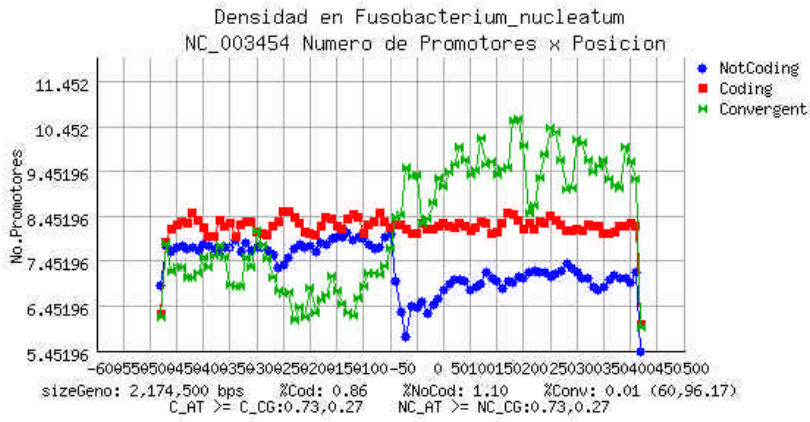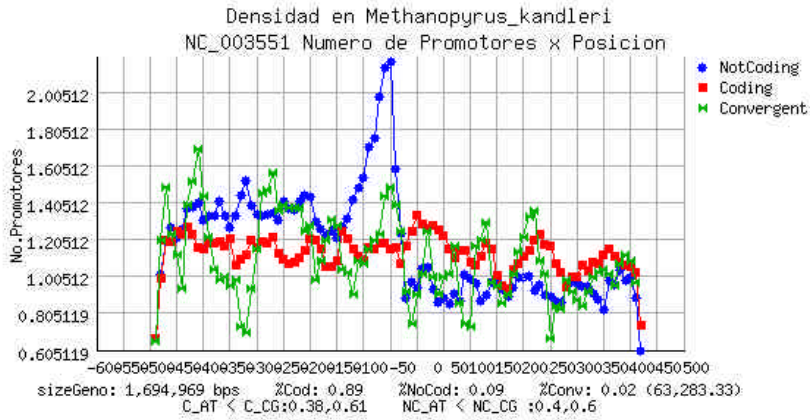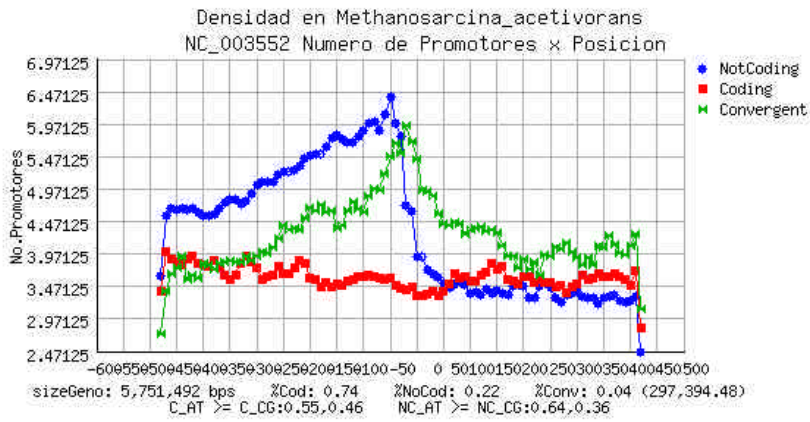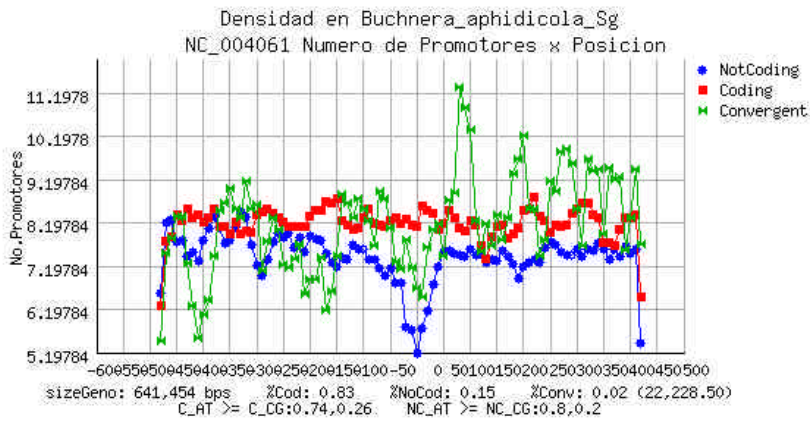

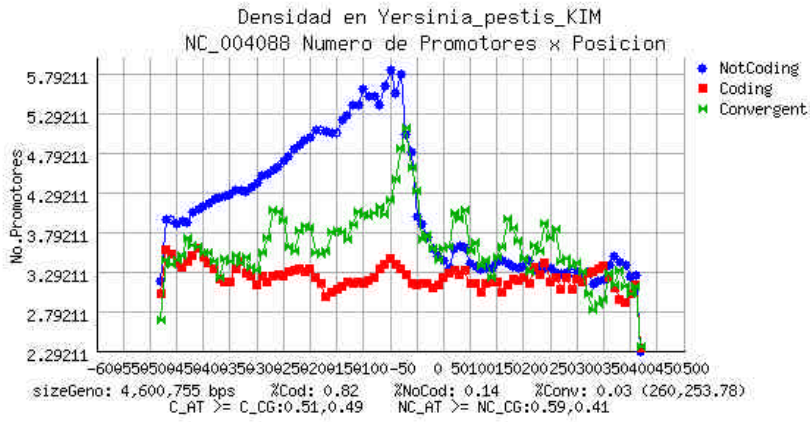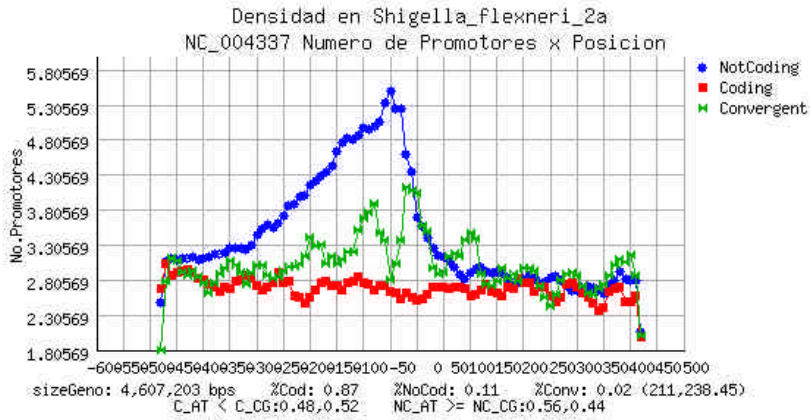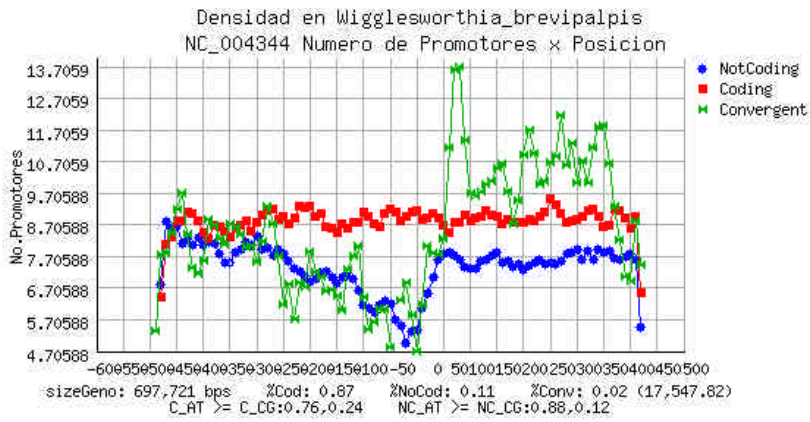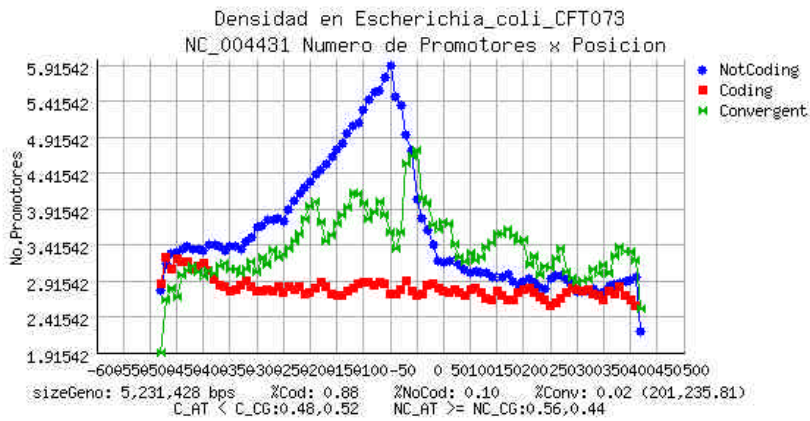

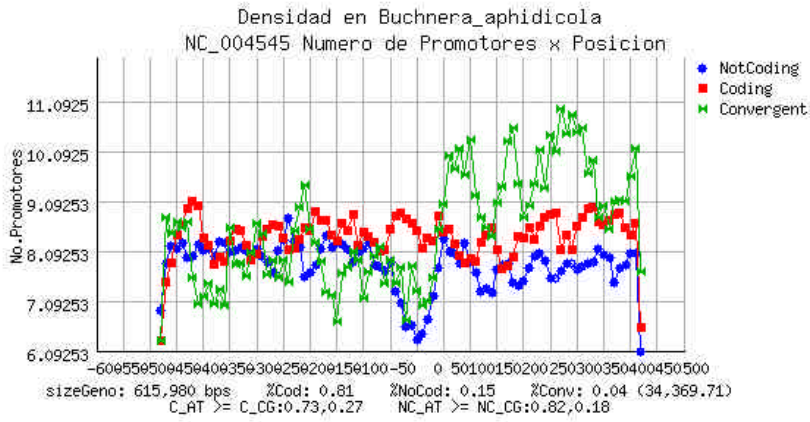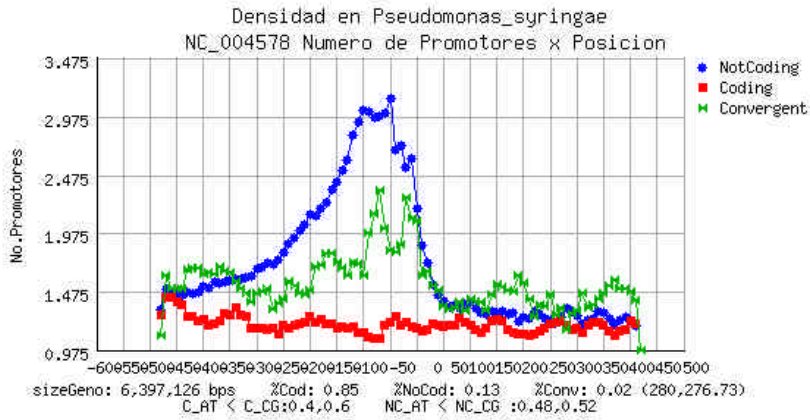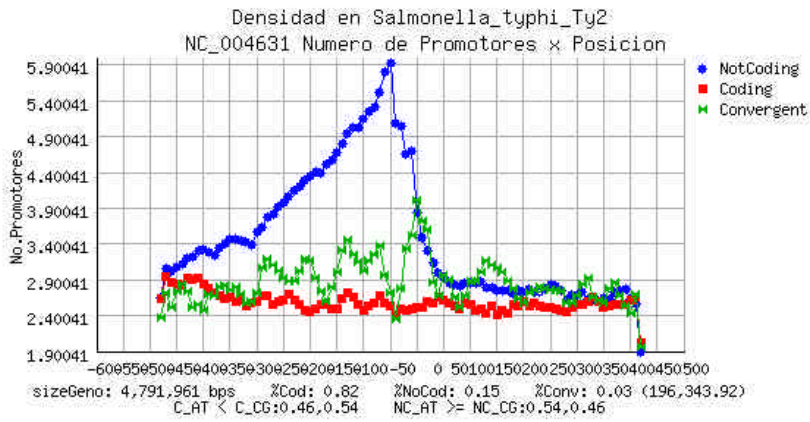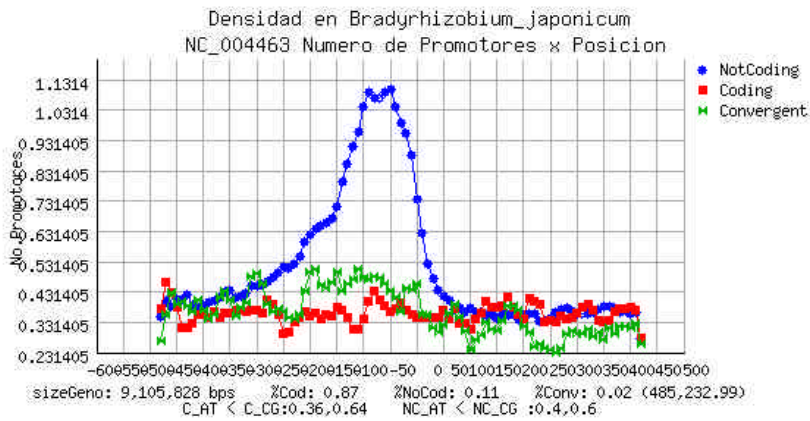

Supplement: pgen.0020185.sg001.pdf [file pgen.0020185.sg001.pdf]

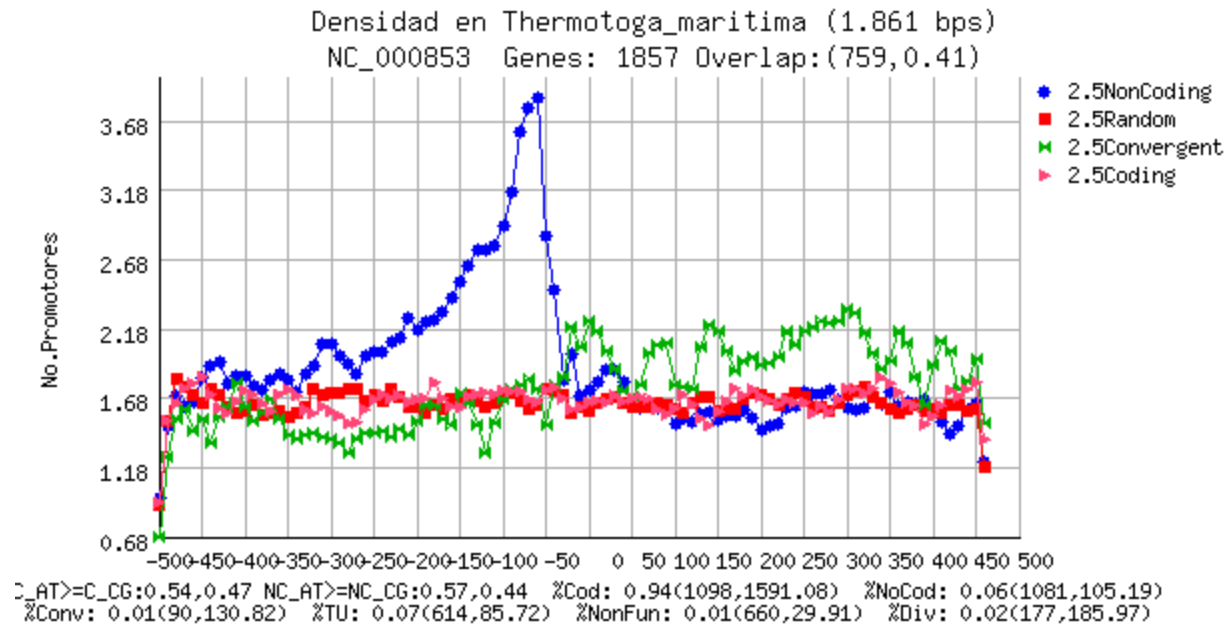

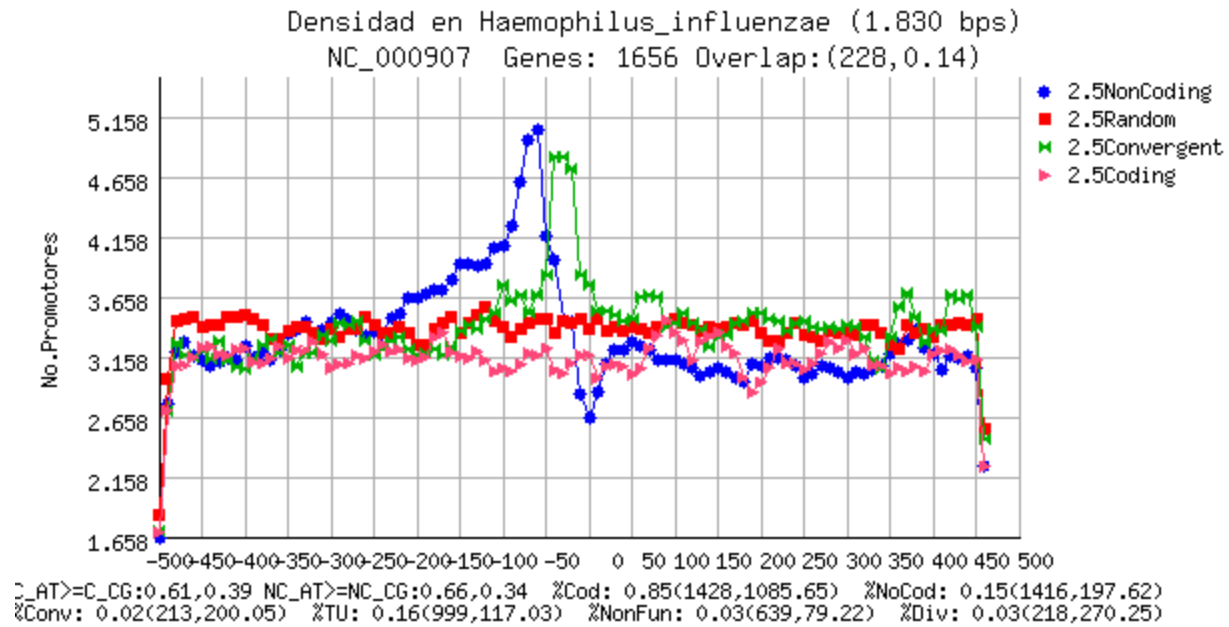

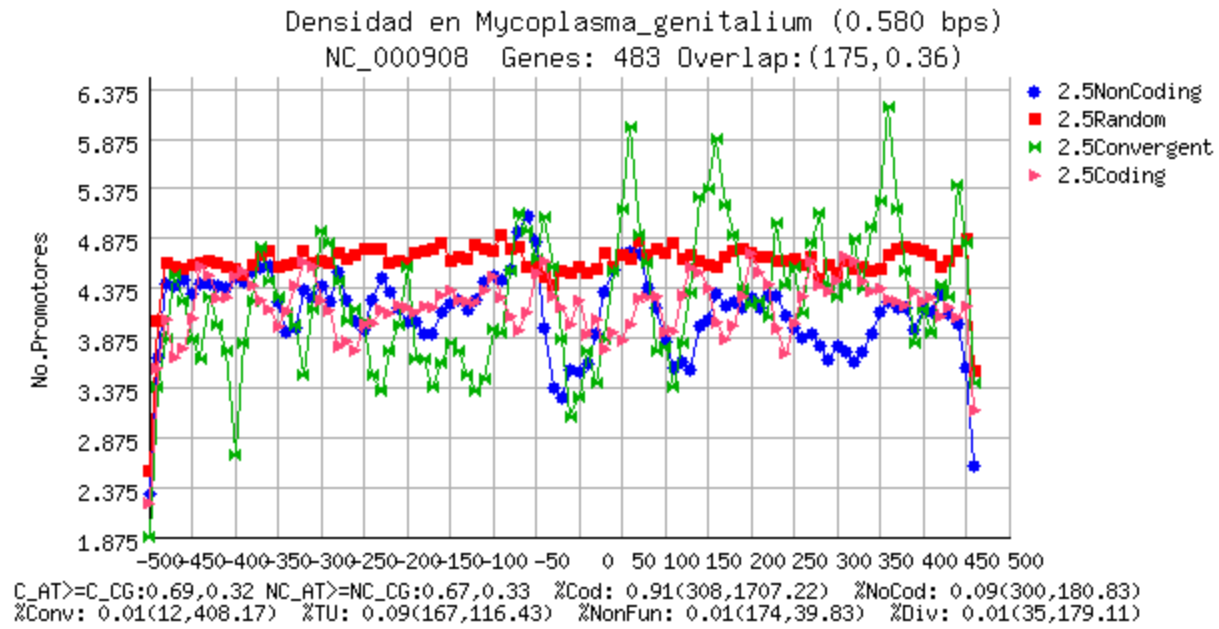

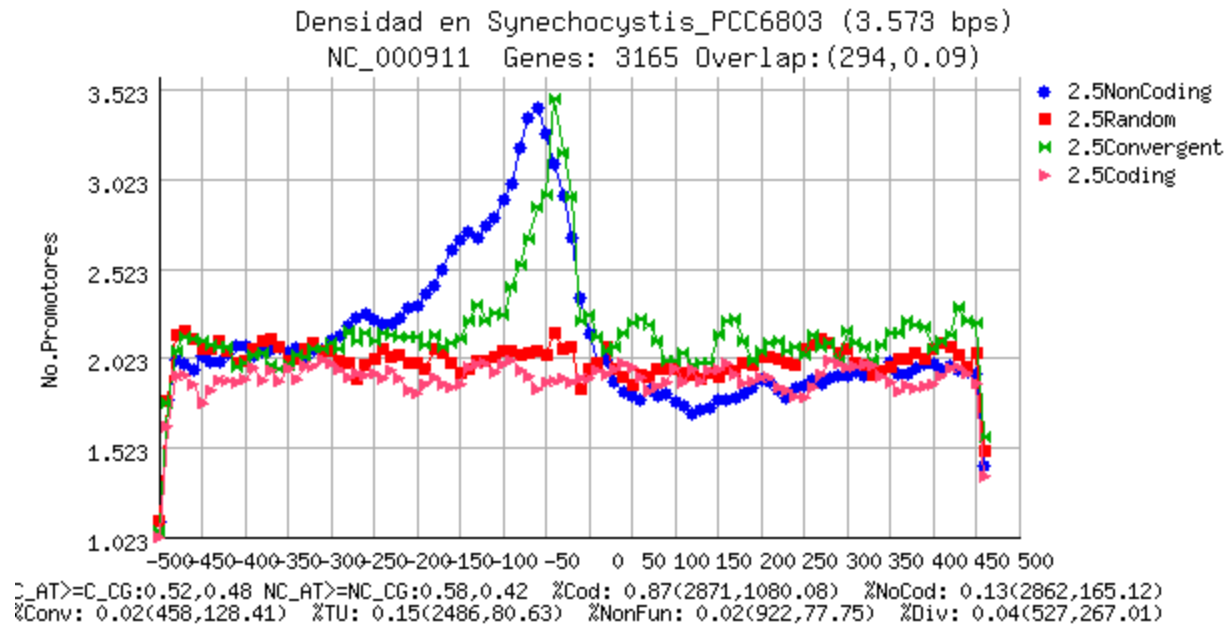

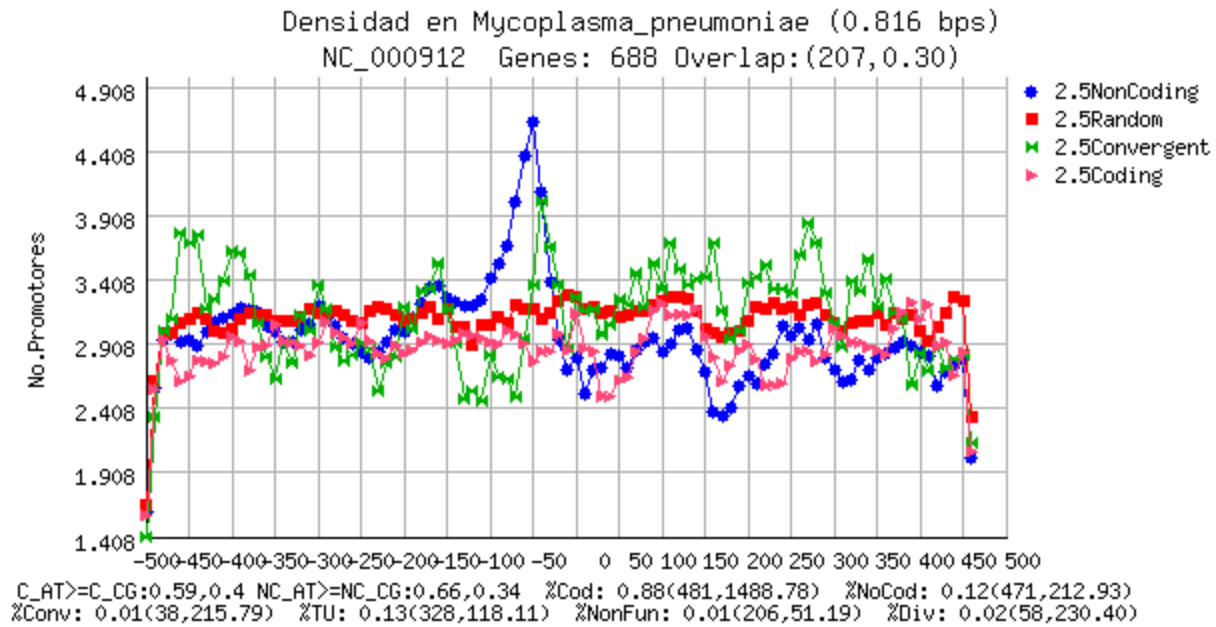

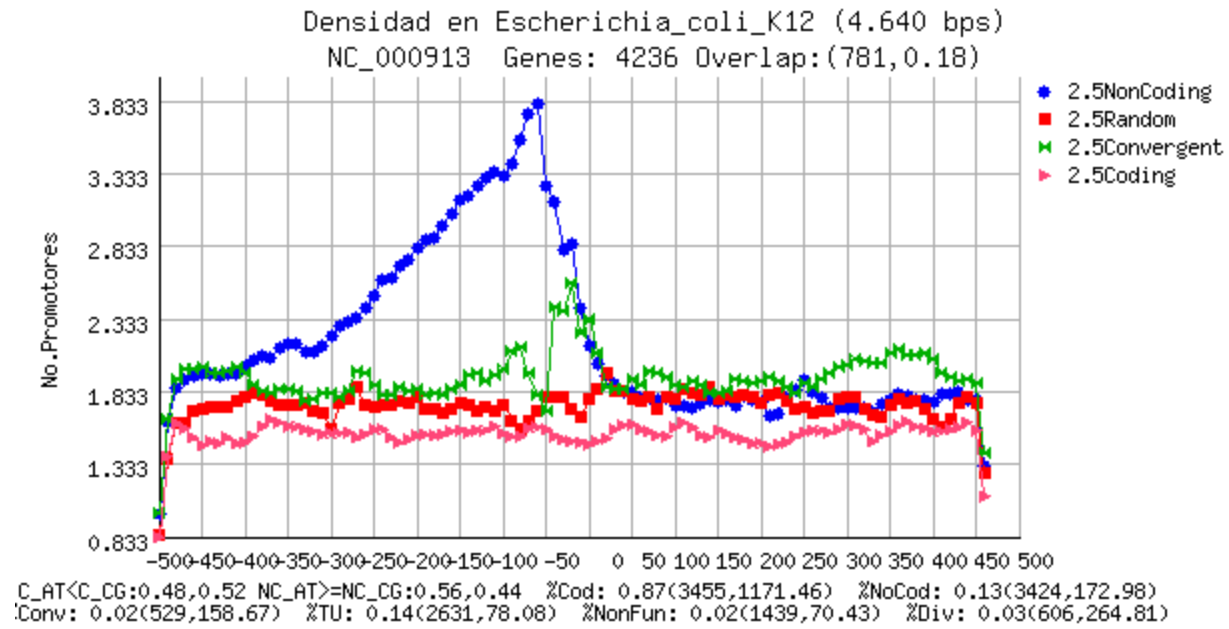

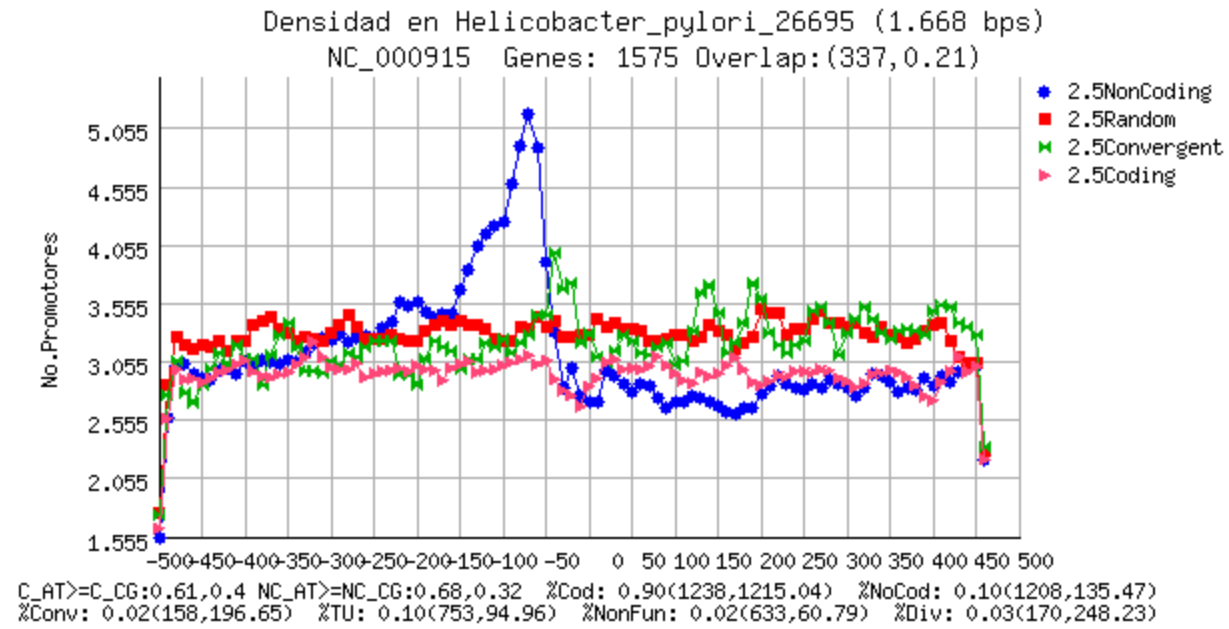

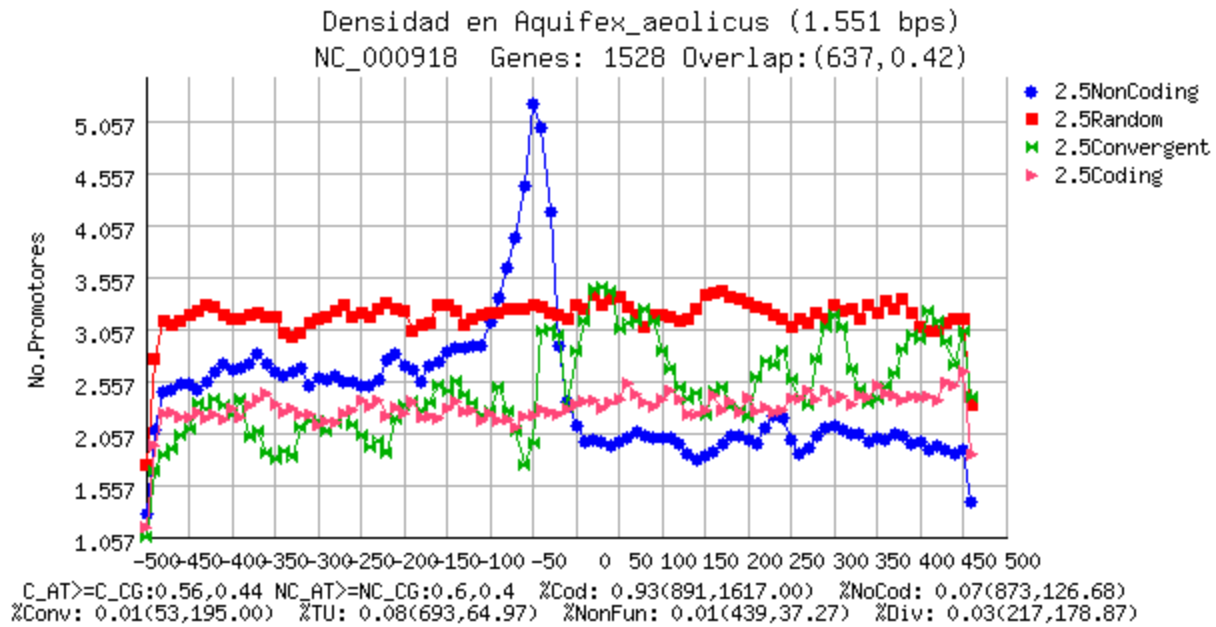



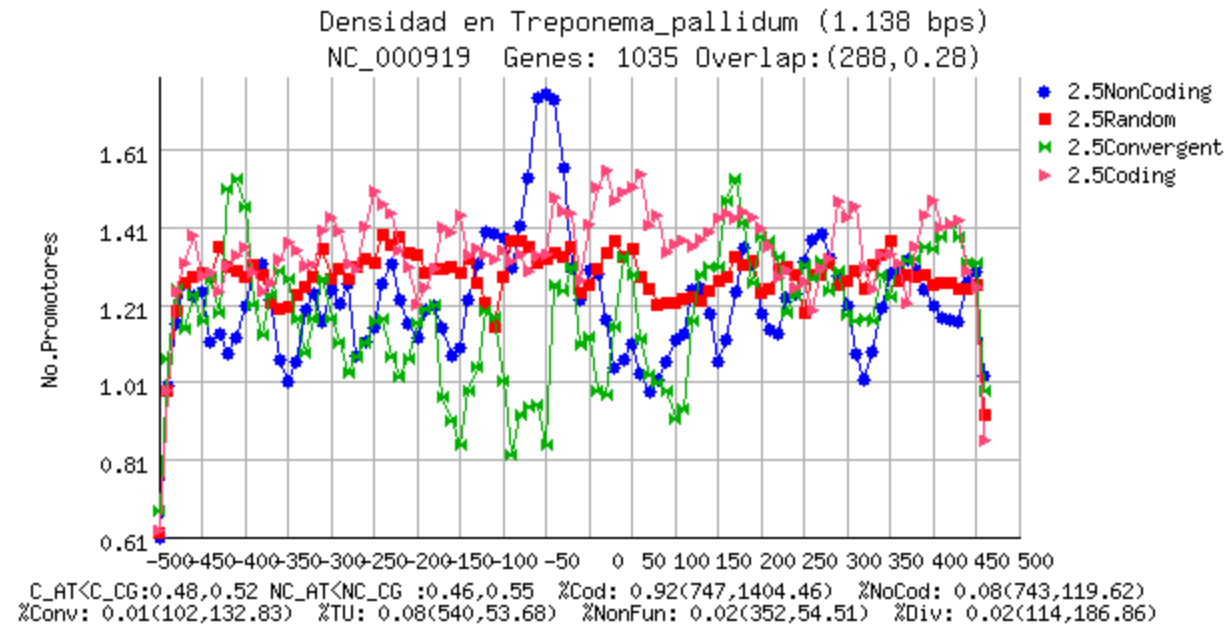

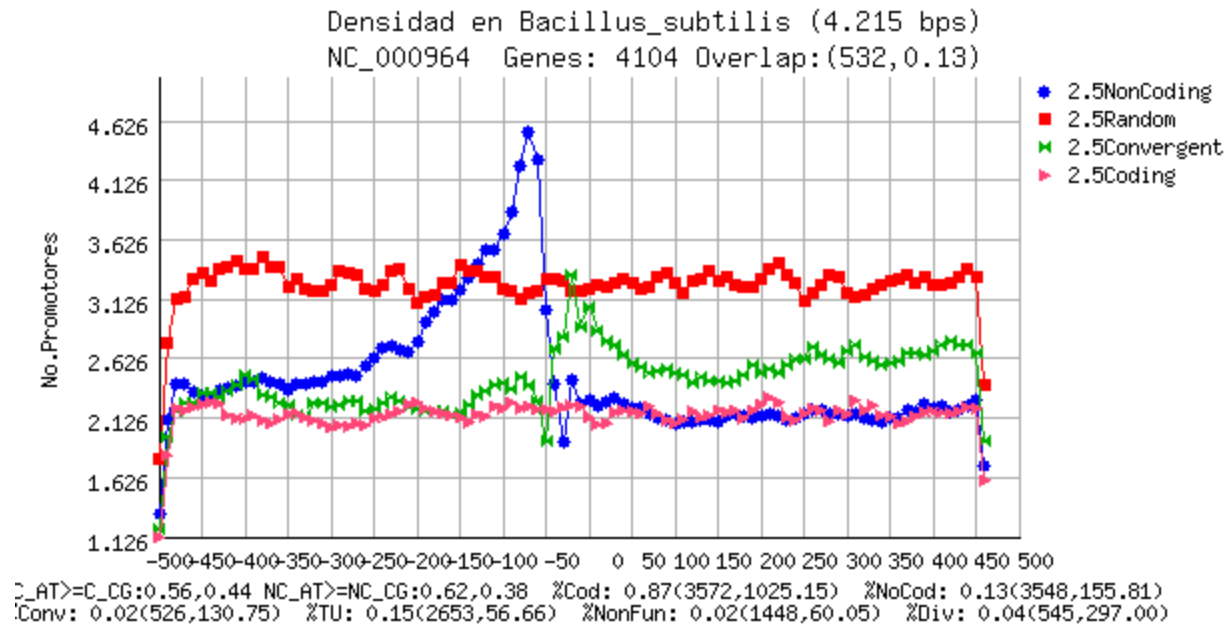

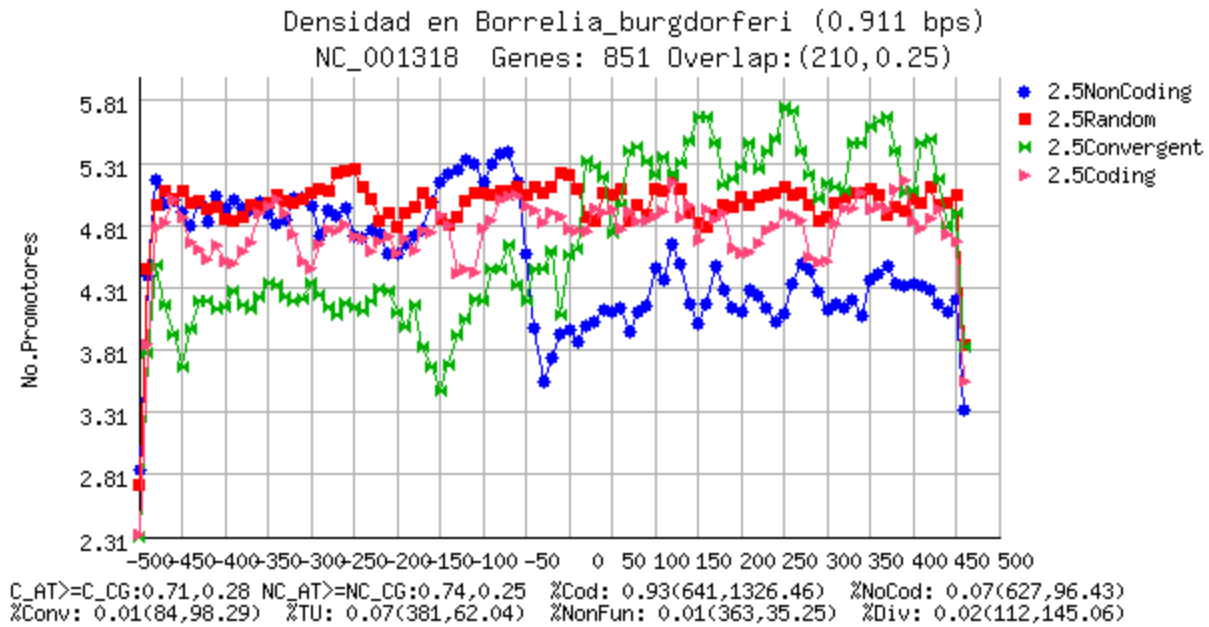

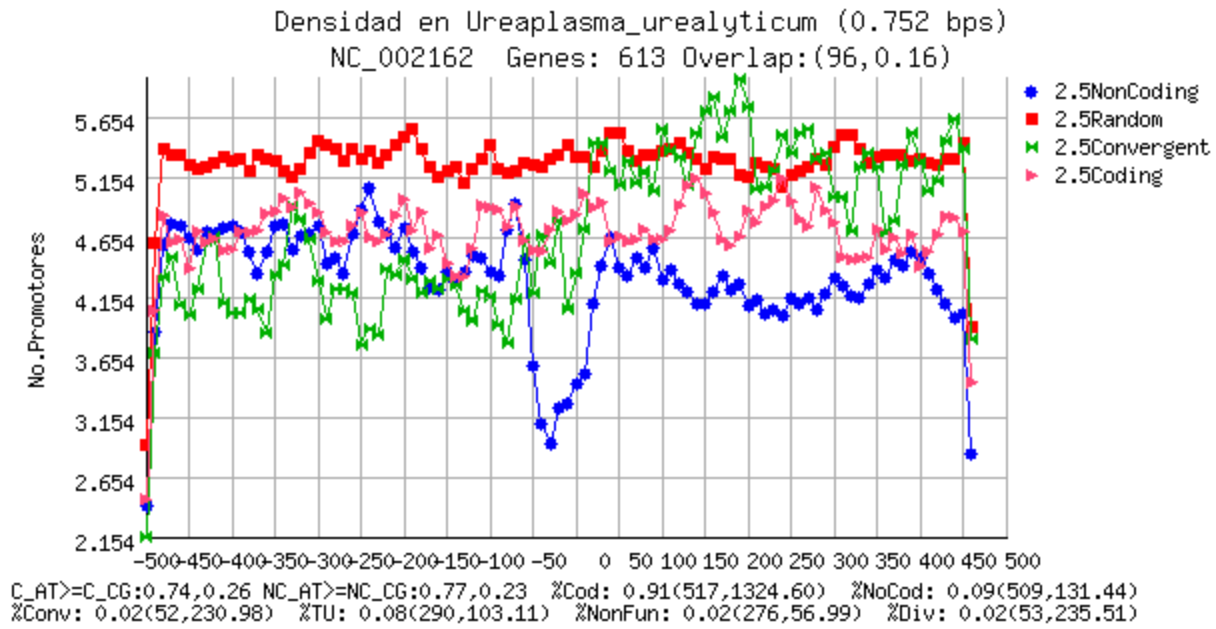

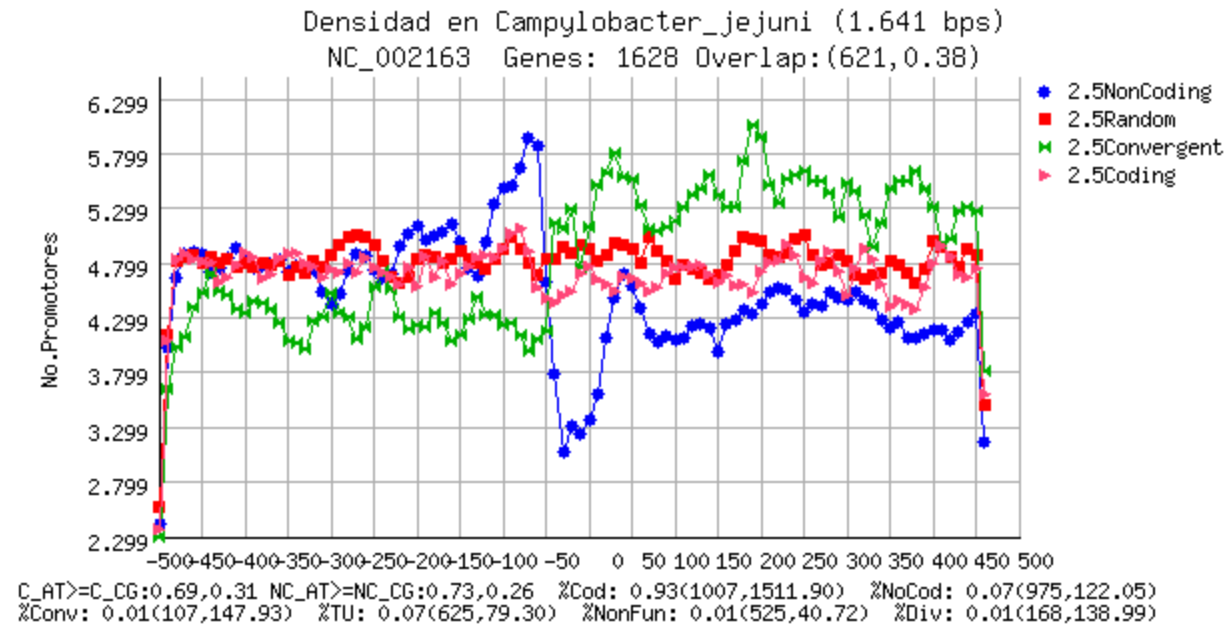

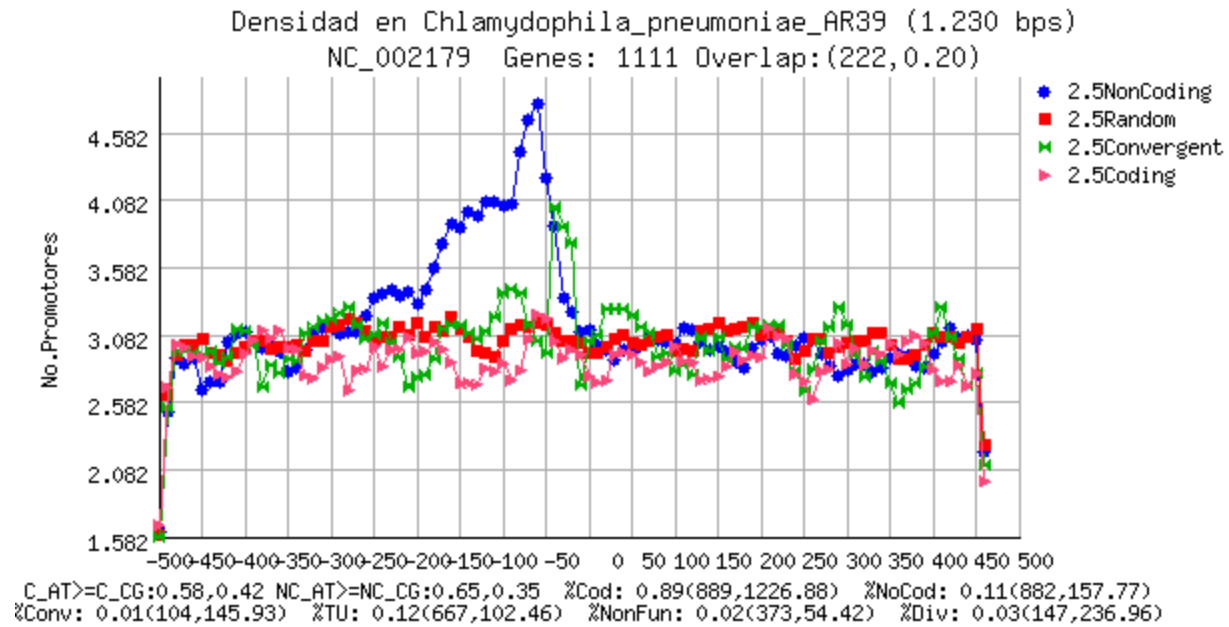

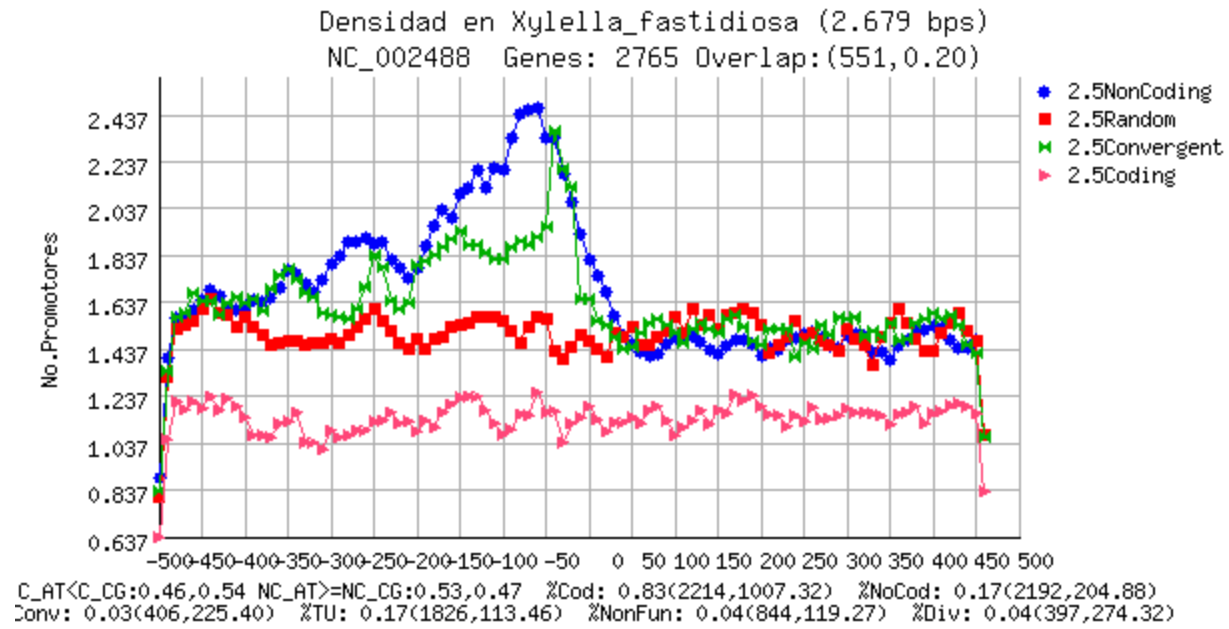

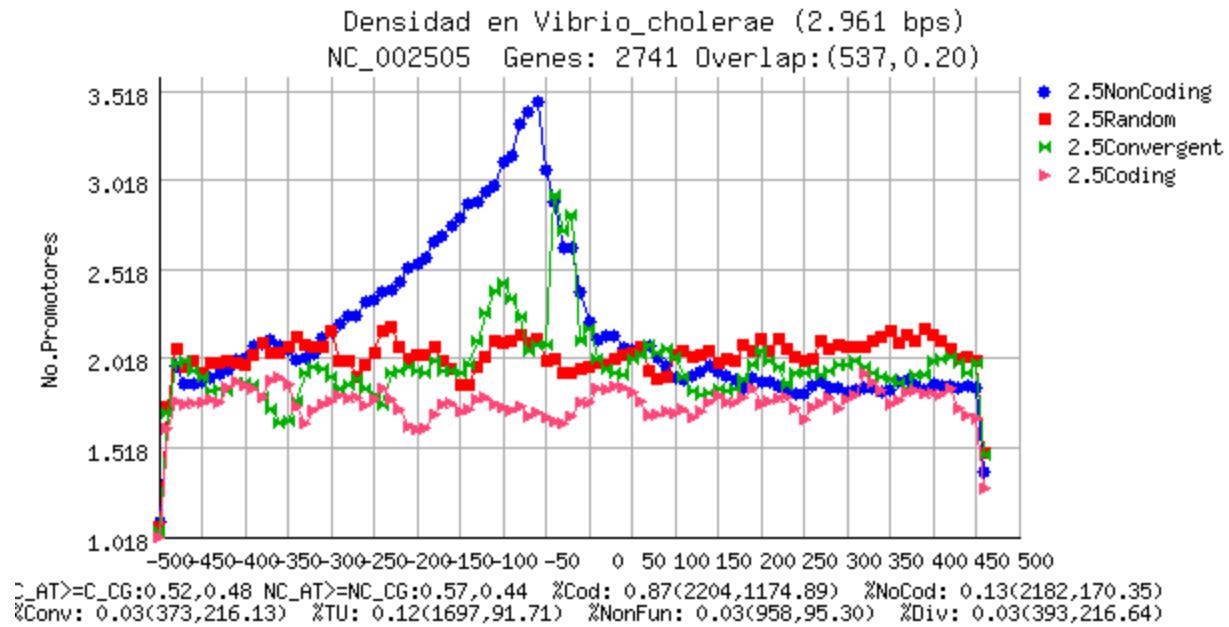



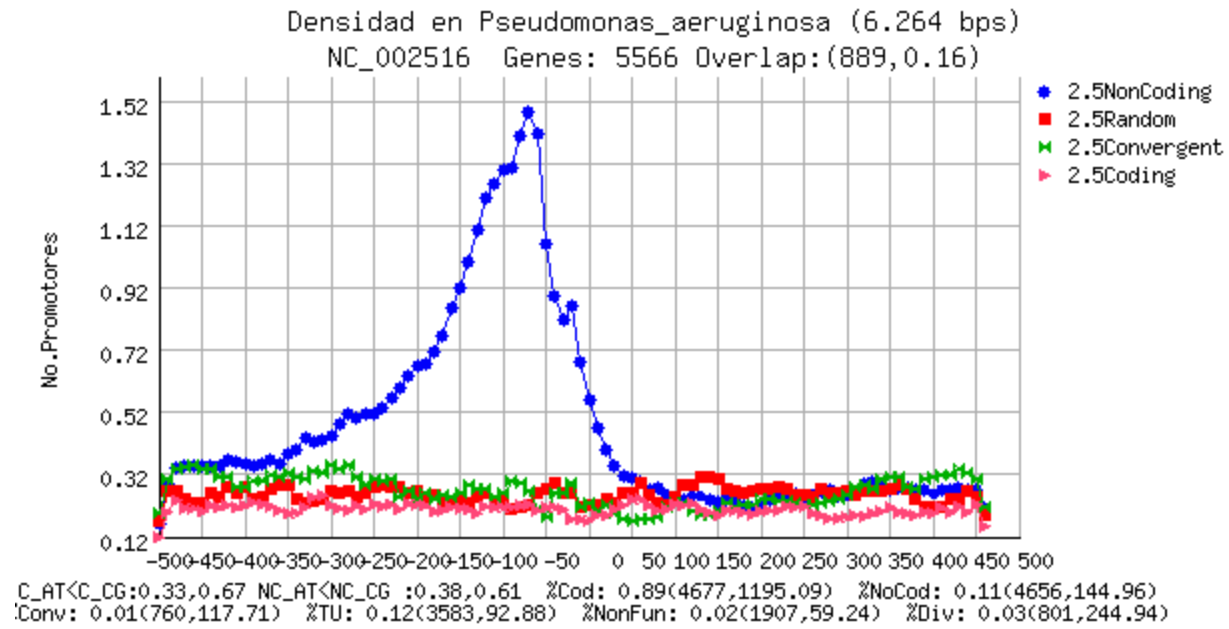

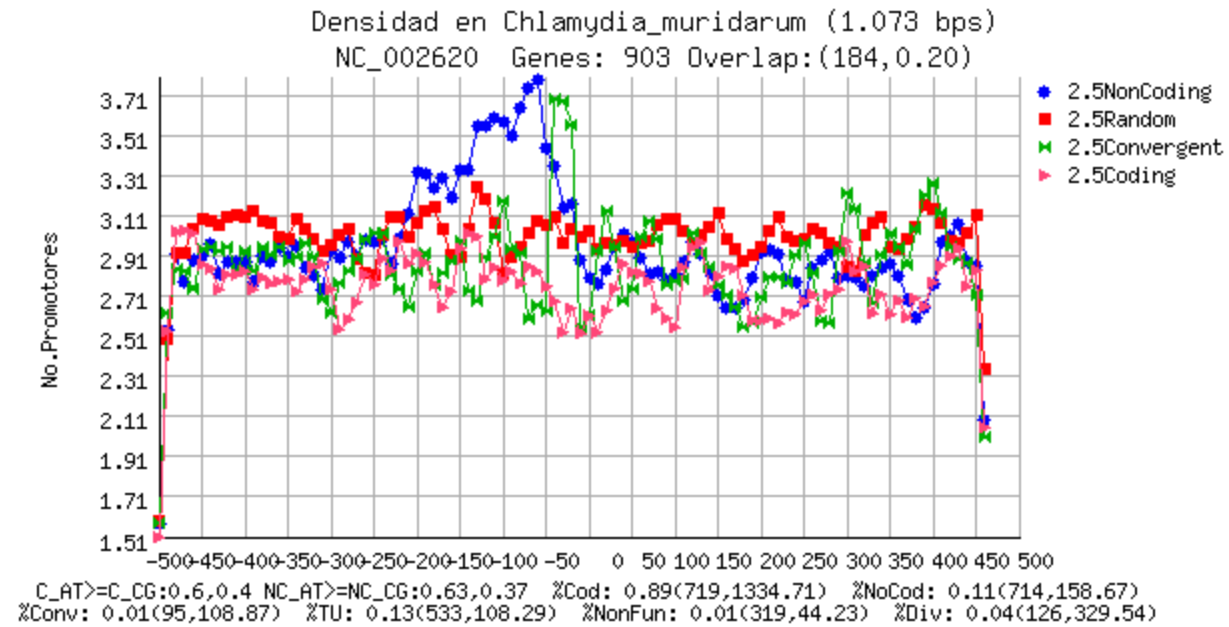

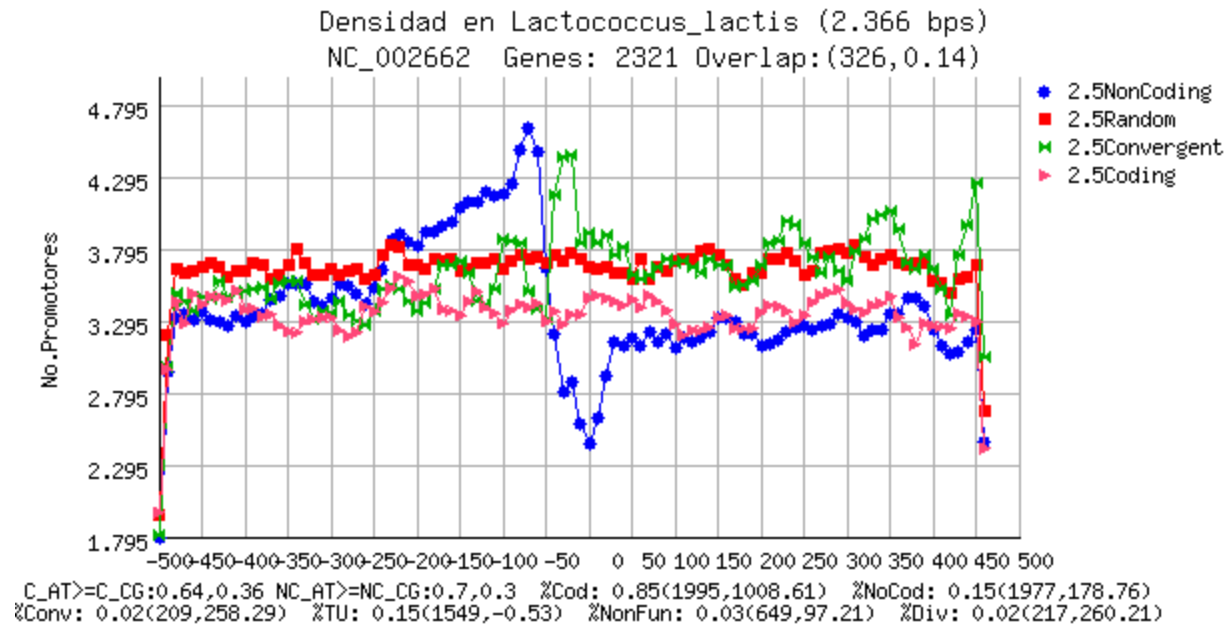

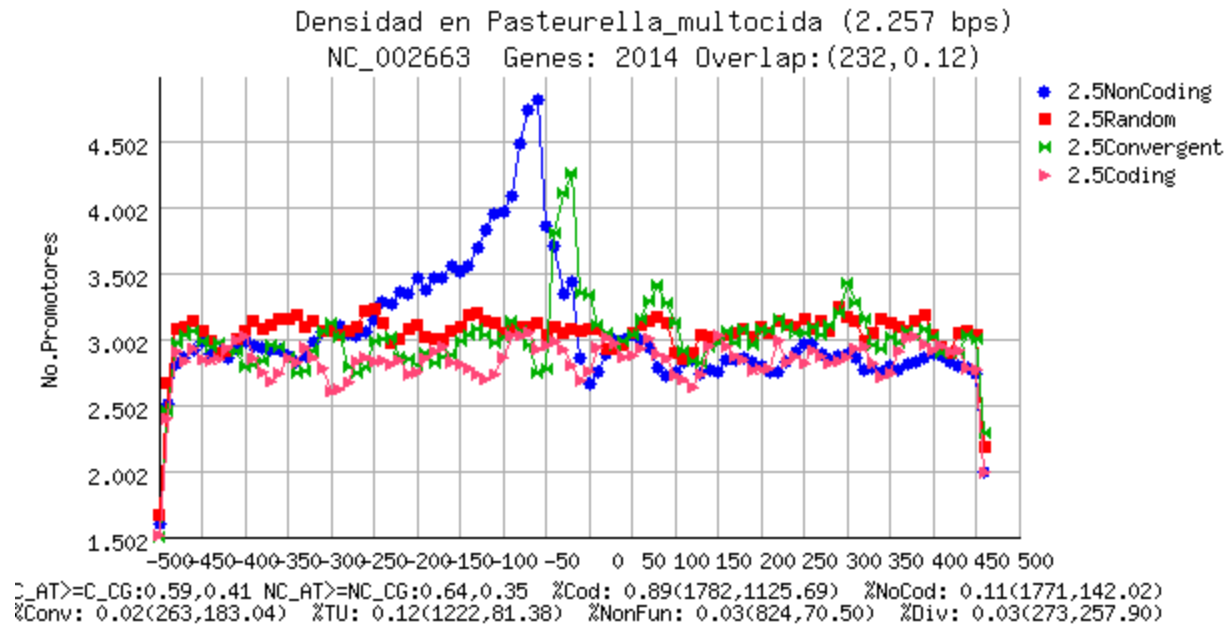

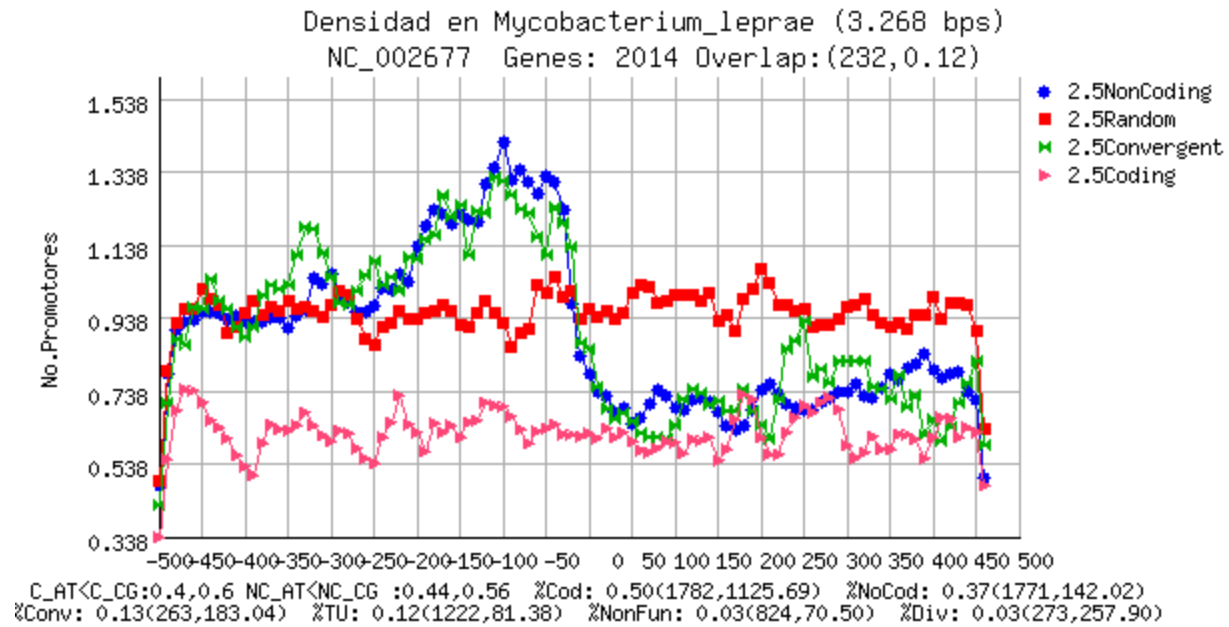

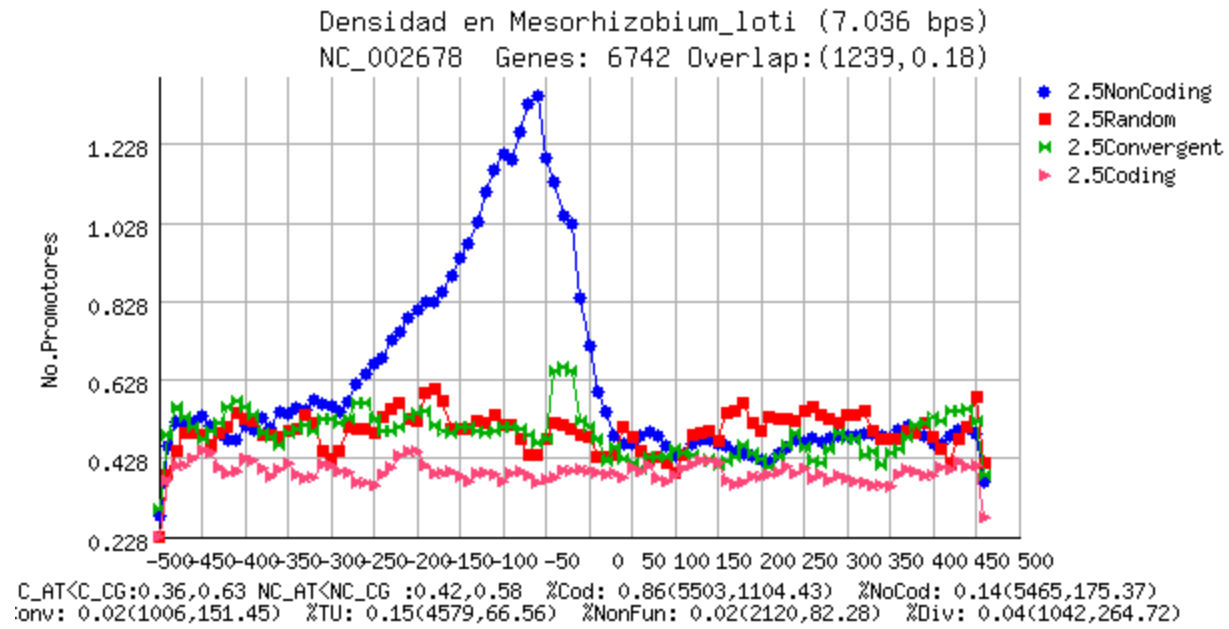

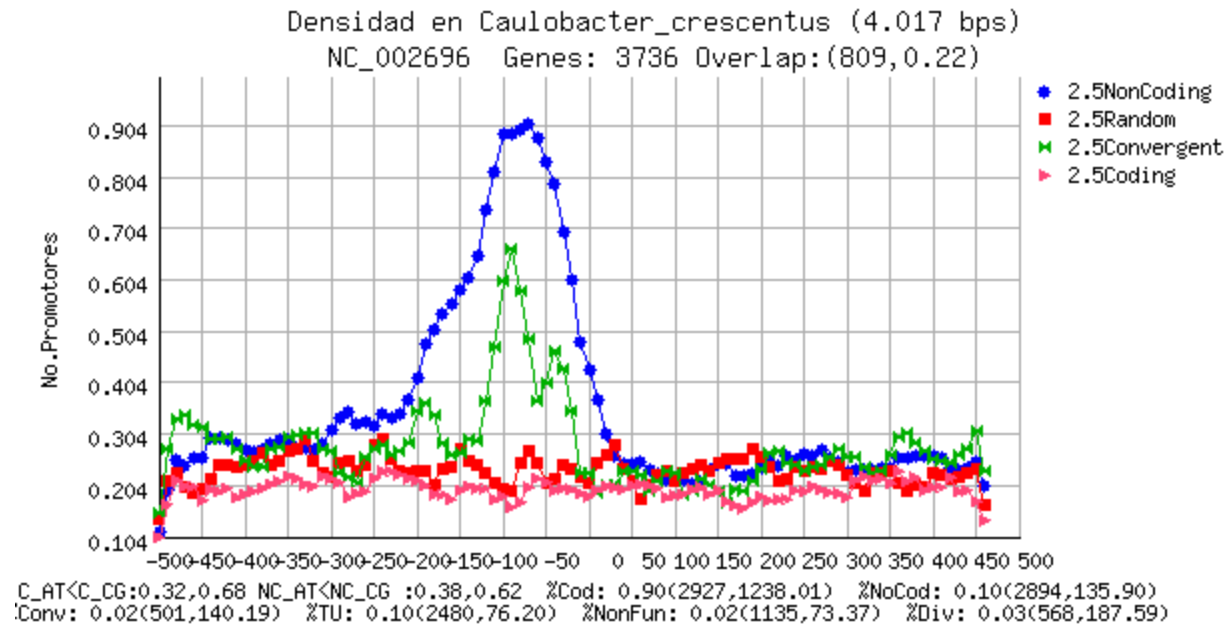

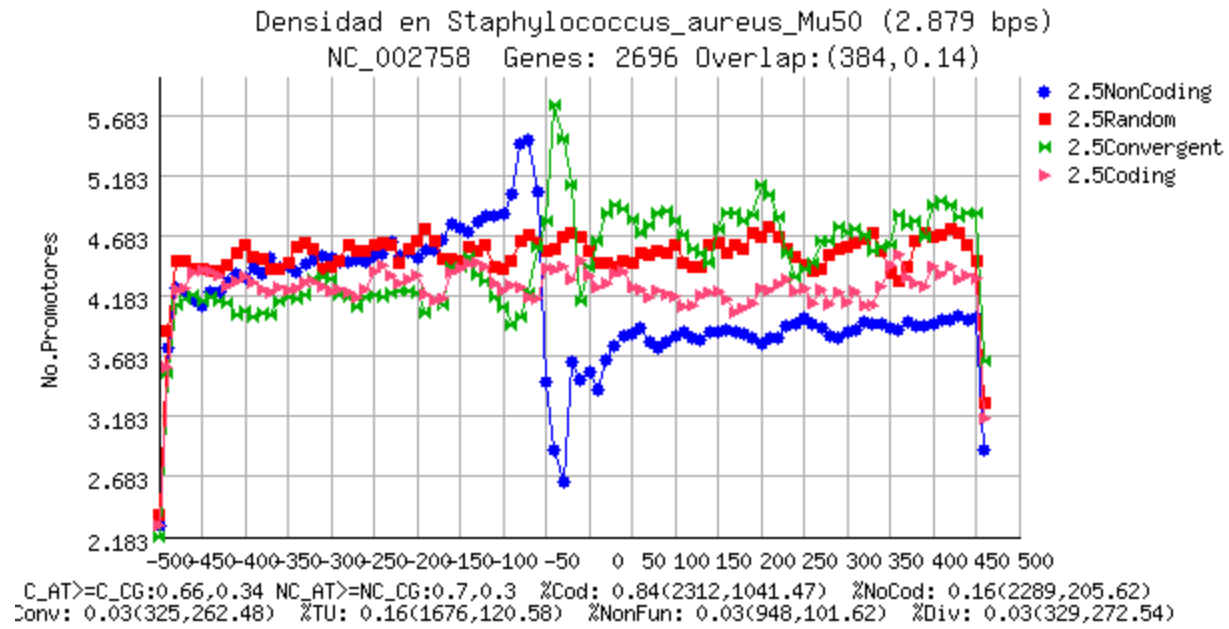



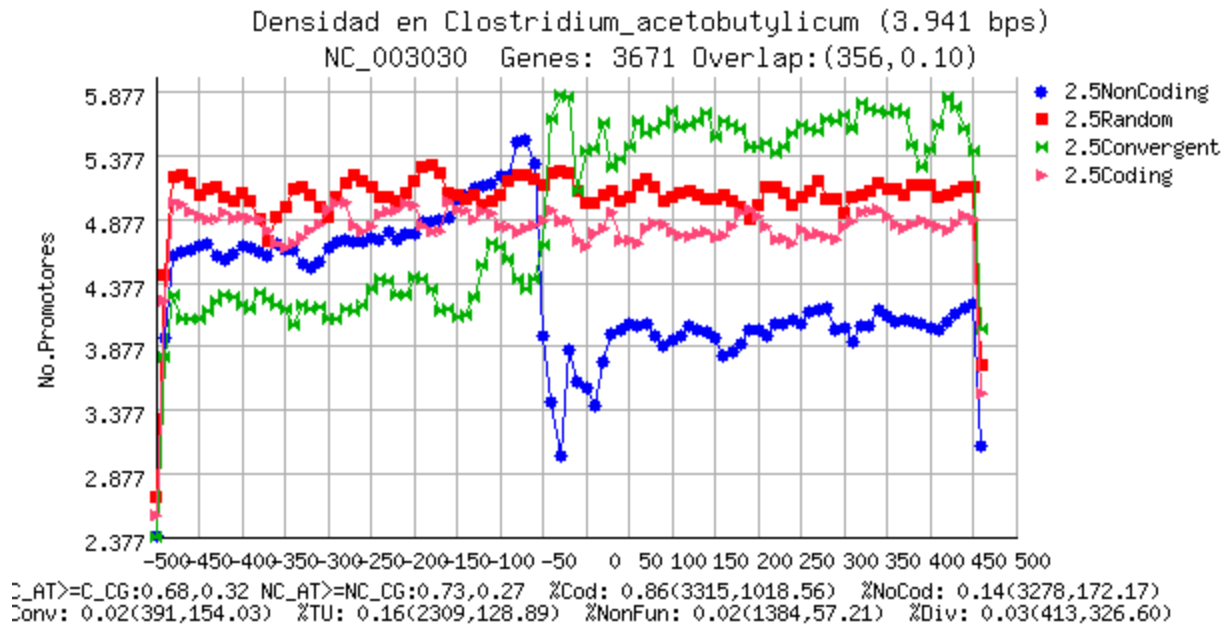

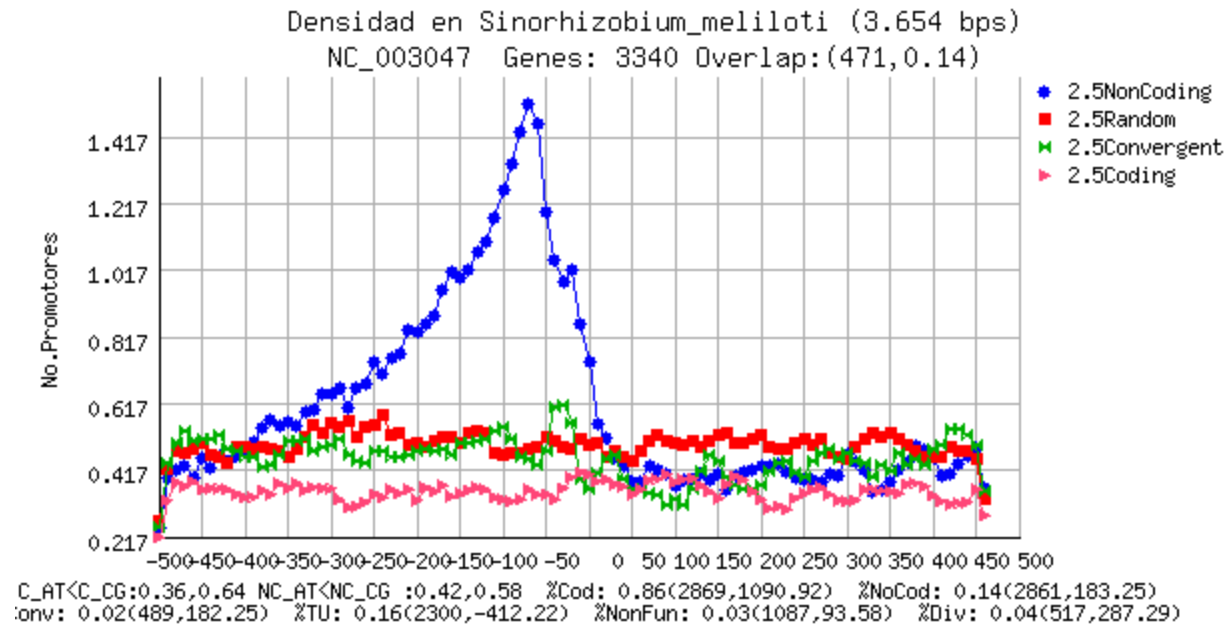

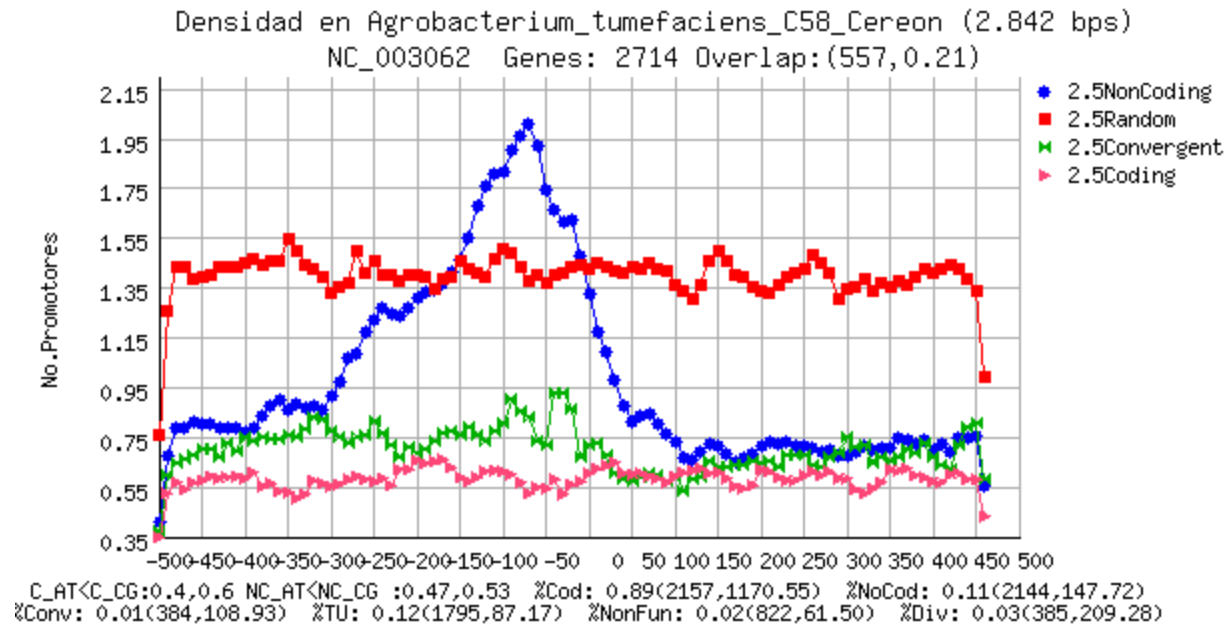

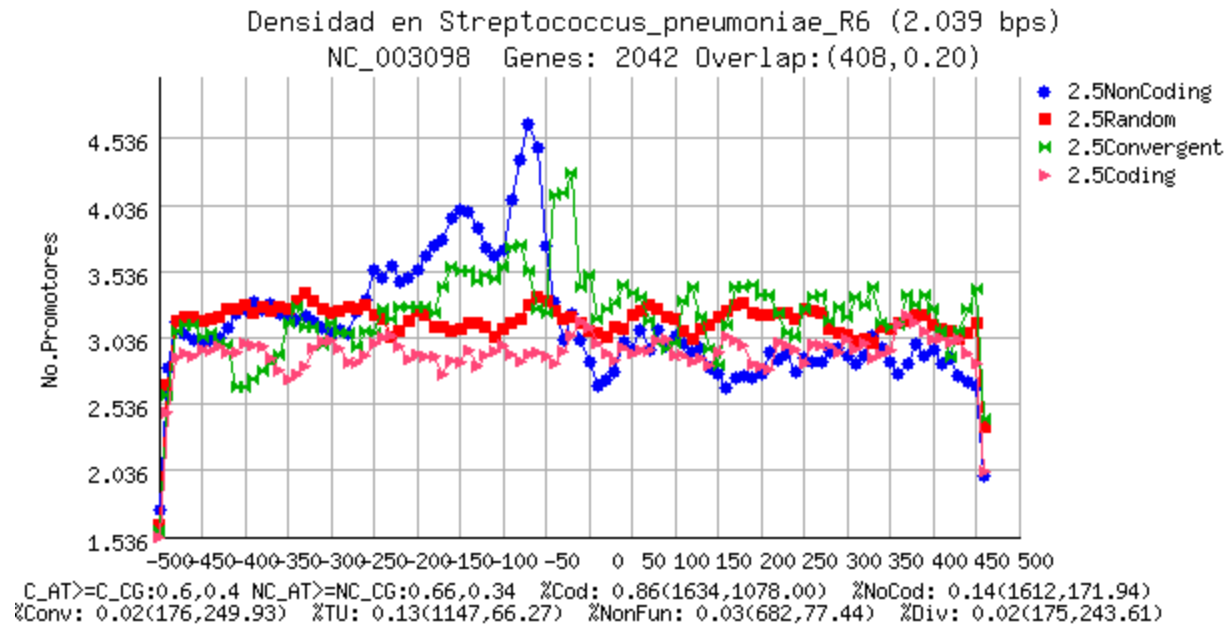

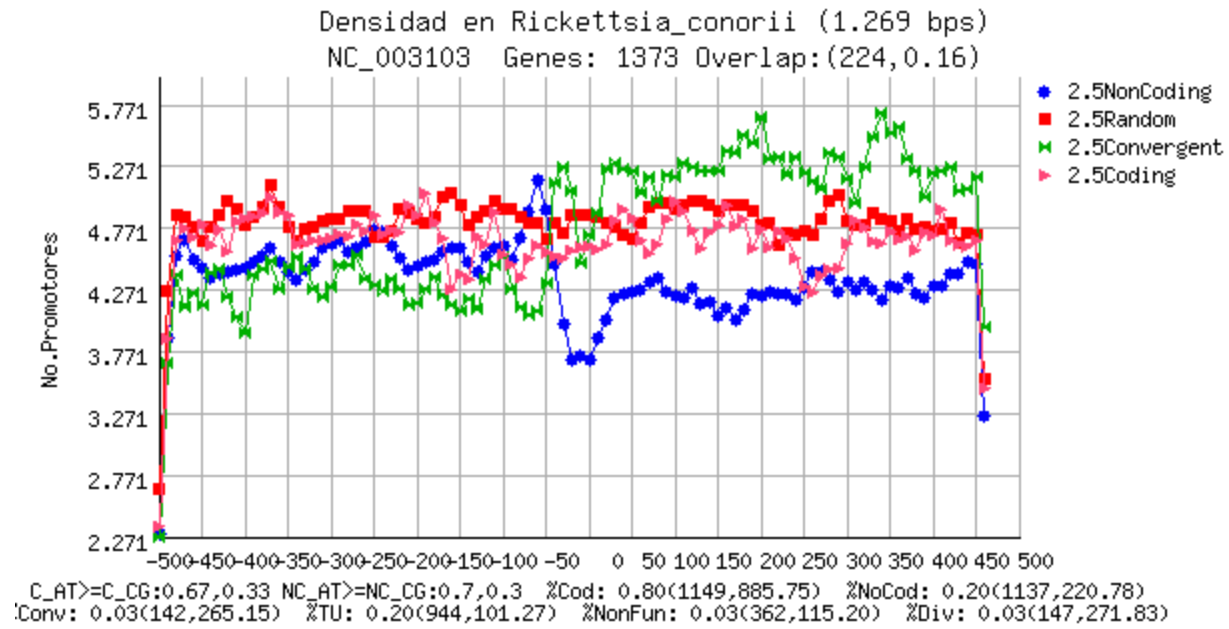

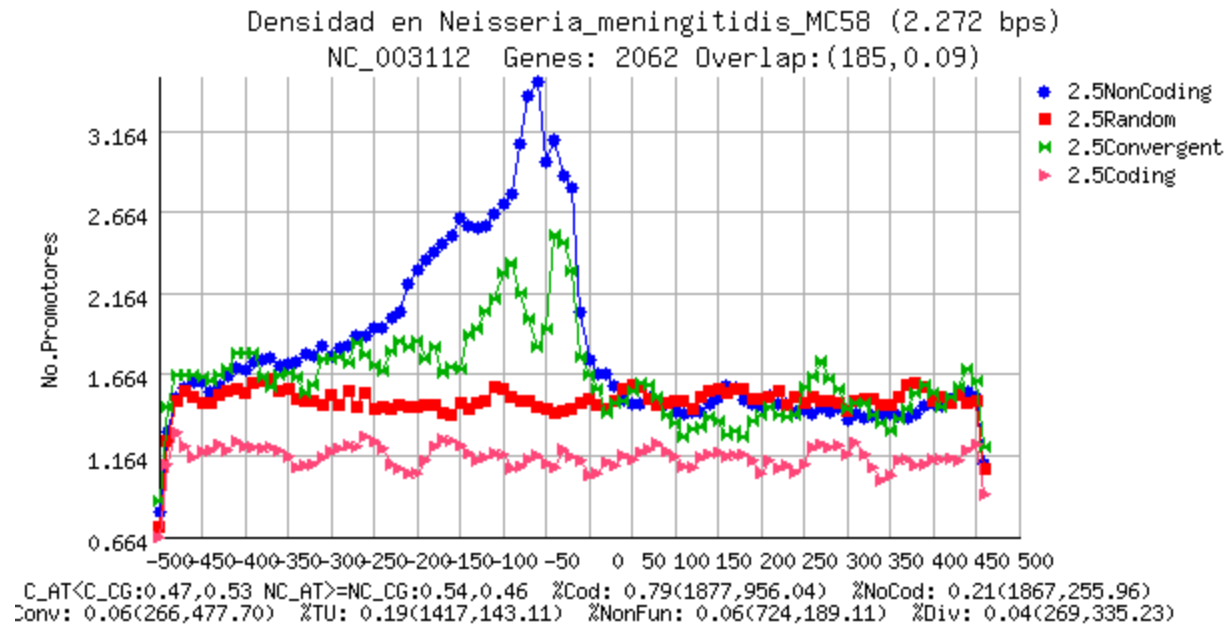

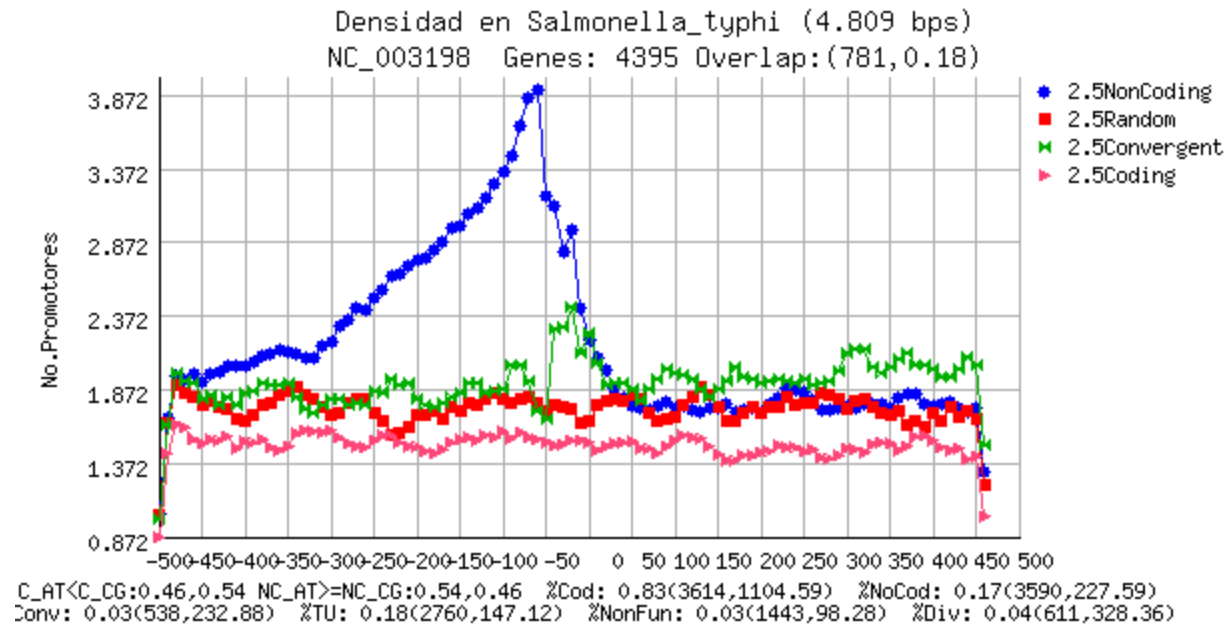

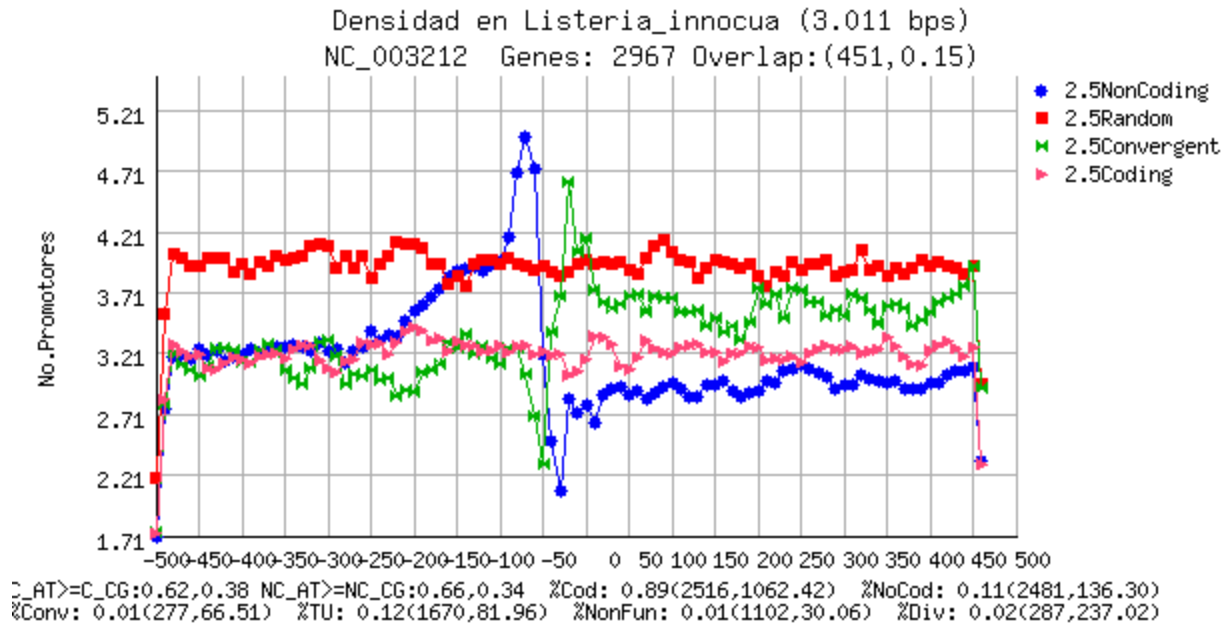



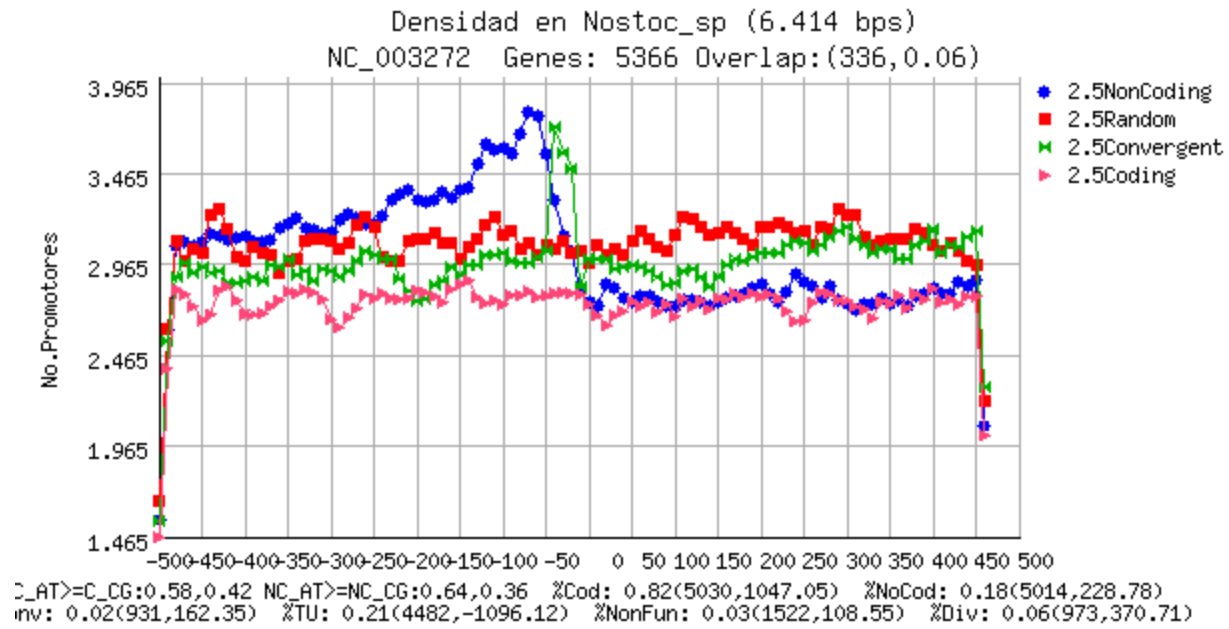

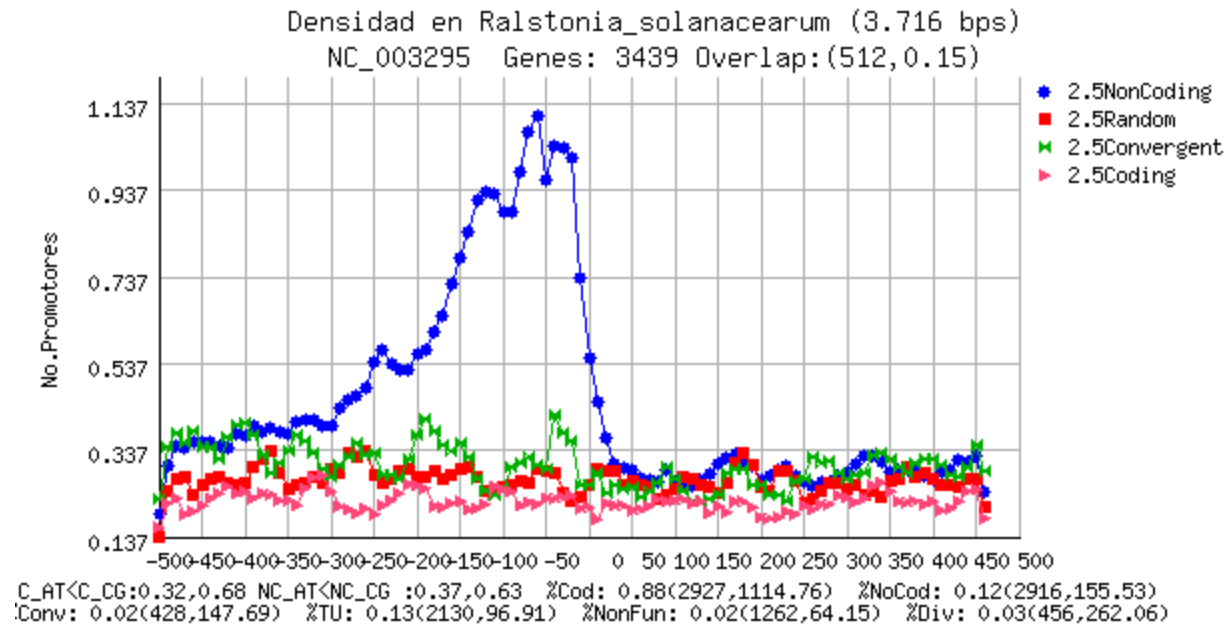

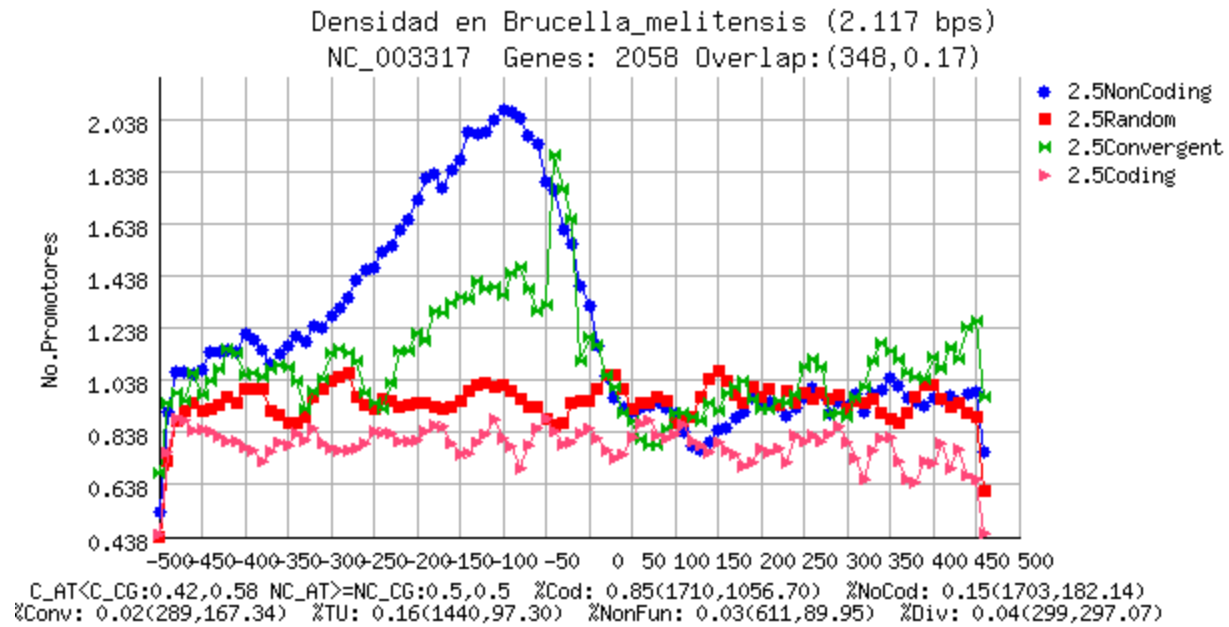

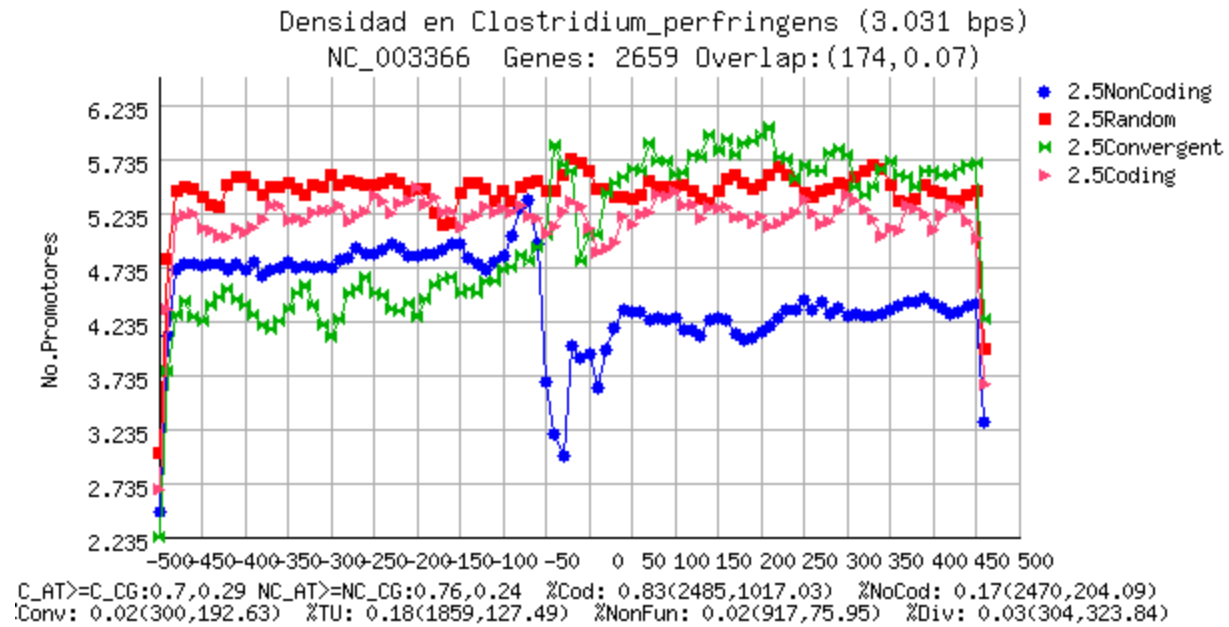

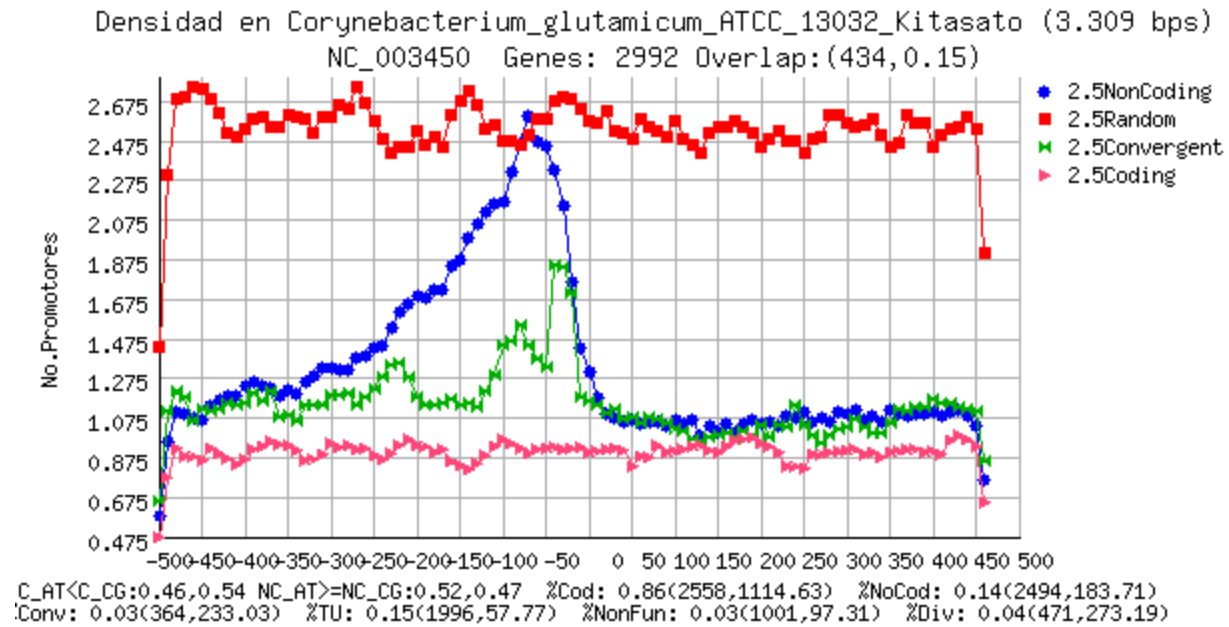

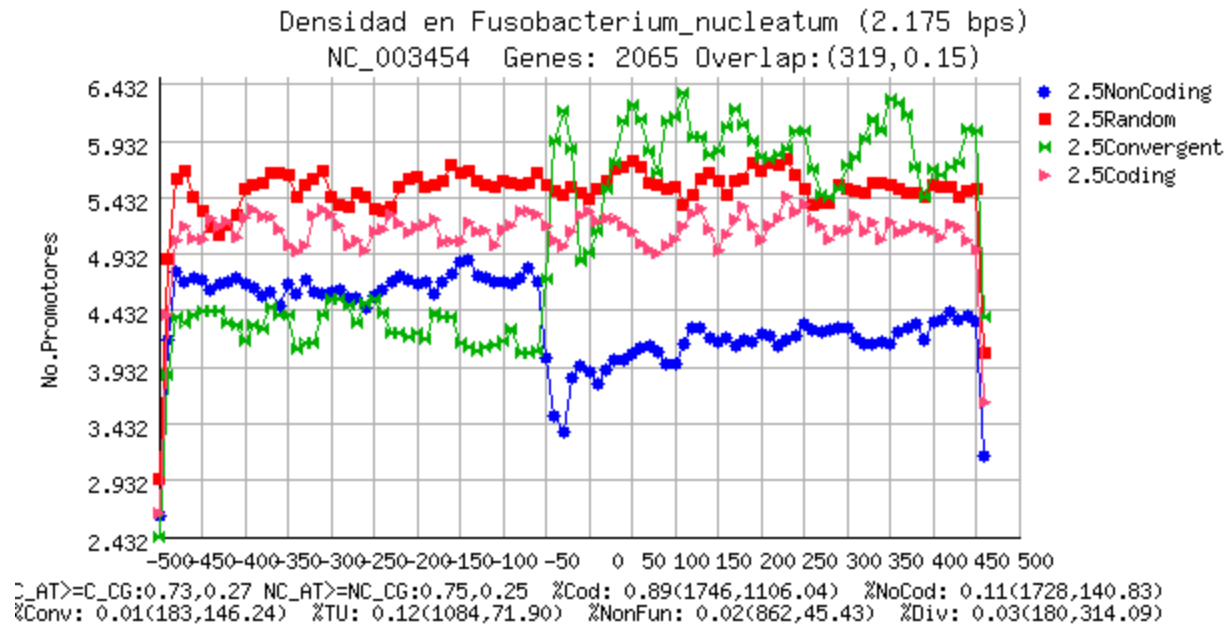

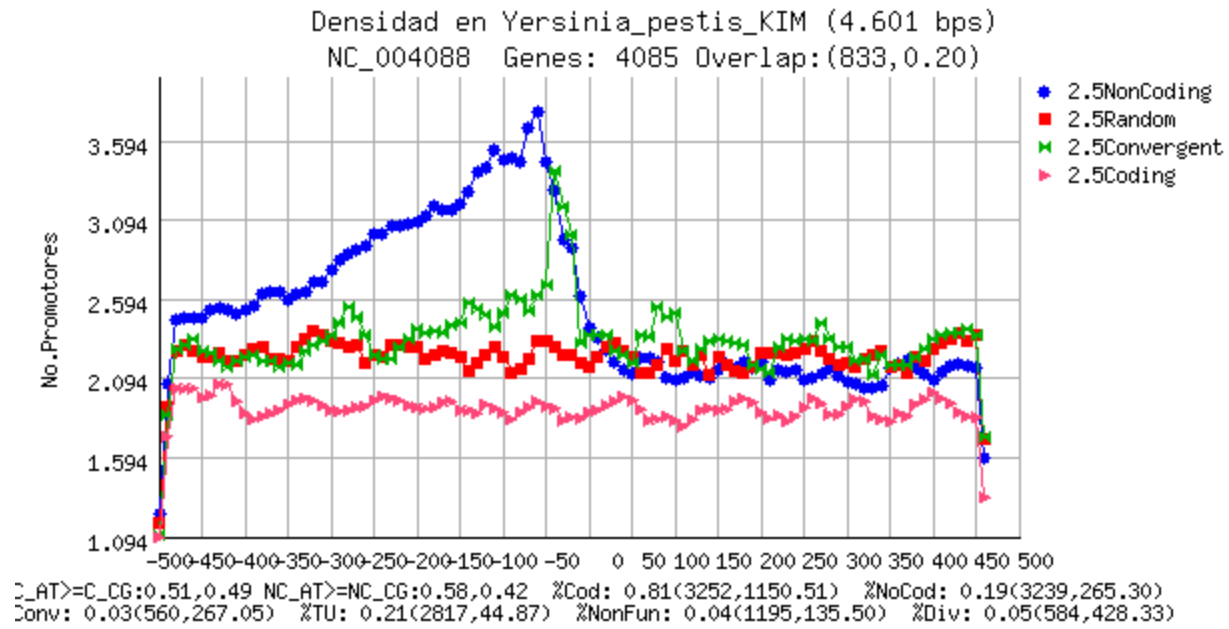

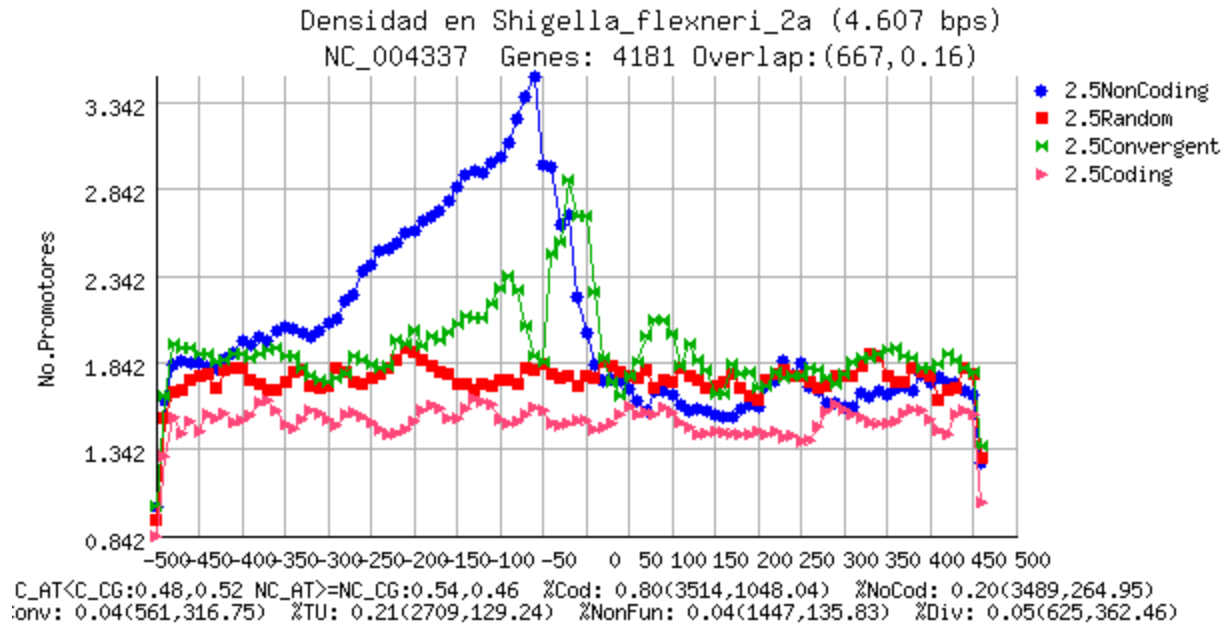



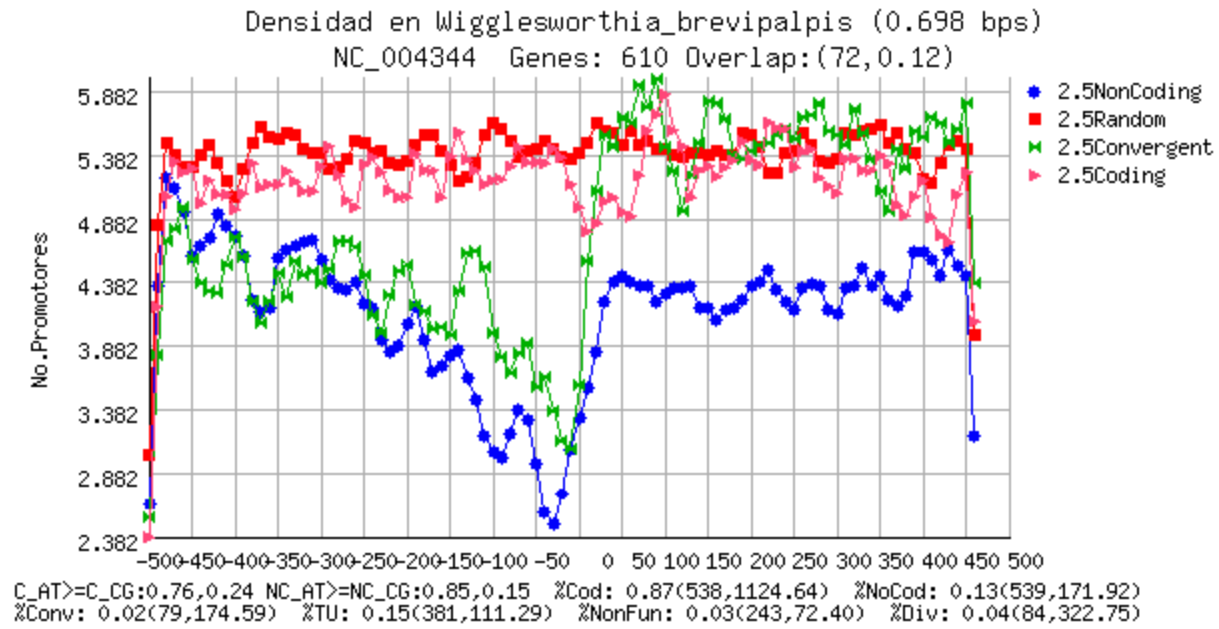

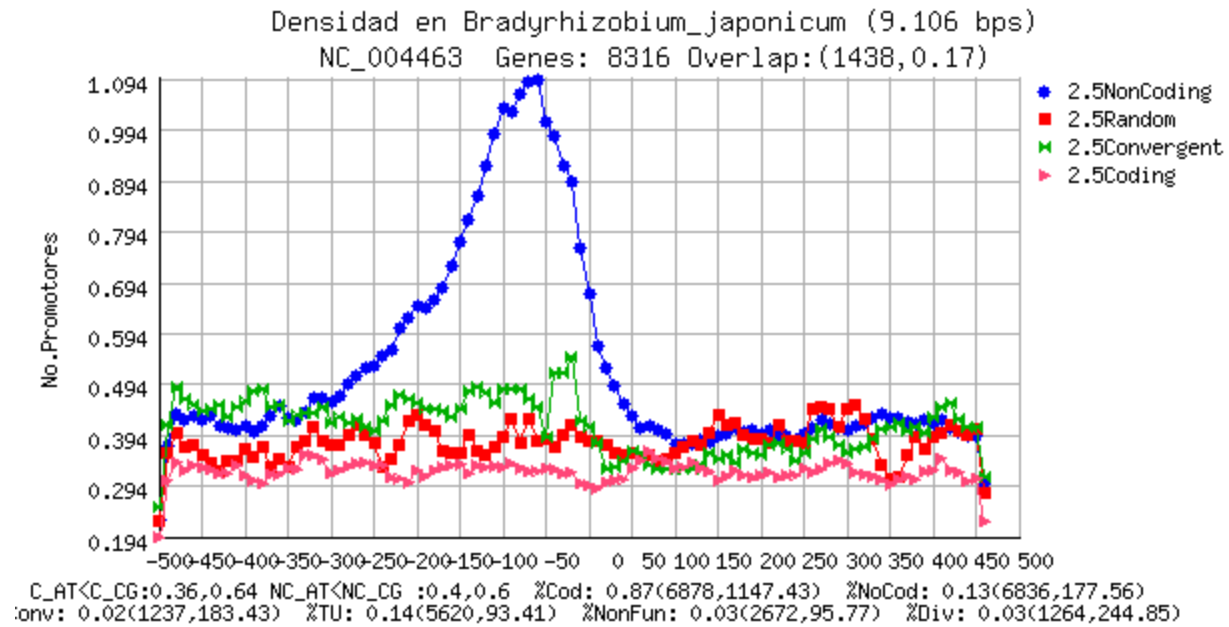

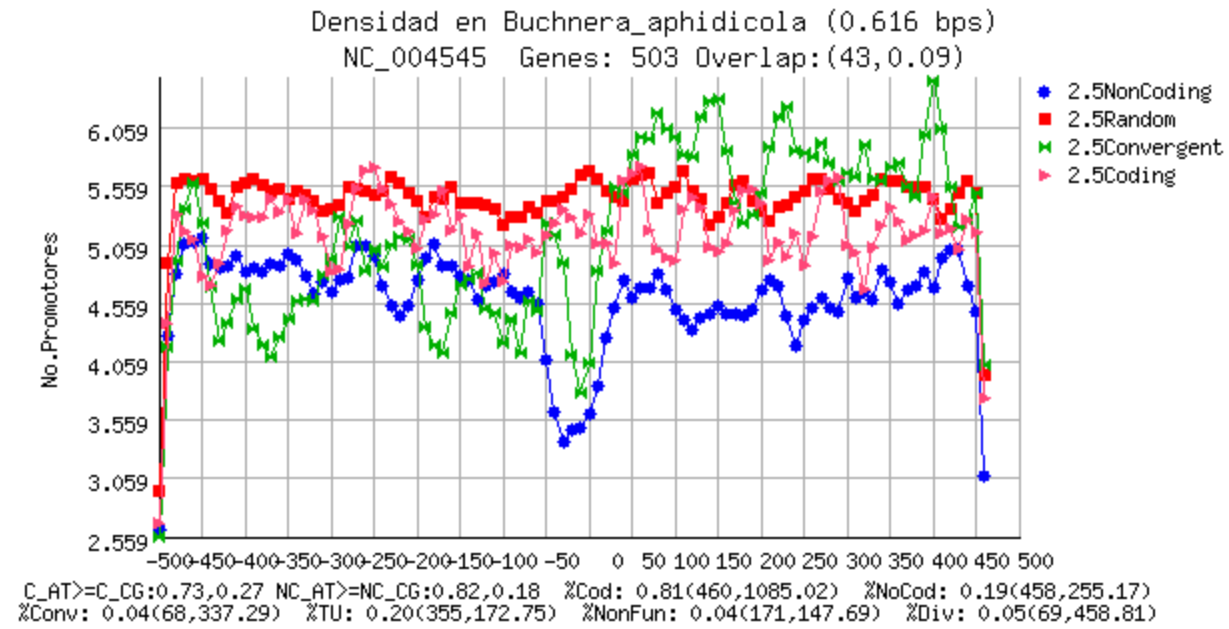

Supplement: pgen.0020185.sg002.pdf [file pgen.0020185.sg002.pdf]
